# Supplementary material for: Phosphonium ylide/organoaluminum-based Lewis pairs for the highly efficient living/controlled polymerization of alkyl (meth)acrylates
Source: Royal Society of Chemistry journal article supplement (doi:10.1039/d3py00301a), 2023-01-01
Supplement: d3py00301a1.pdf [file d3py00301a1.pdf]

Supporting Information

**Phosphonium Ylide/Organoaluminum-Based Lewis Pairs for the Highly  
Efficient Living/controlled Polymerization of Alkyl (Meth)acrylates**

*Zhikang Chen,<sup>‡a</sup> Wuchao Zhao,<sup>‡b</sup> Conglei Liu,<sup>a</sup> Liuying Jiang,<sup>\*a</sup> Gang Fu,<sup>a</sup> Yuetao Zhang,<sup>\*b</sup> and*

*Hongping Zhu<sup>\*a</sup>*

*<sup>a</sup> State Key Laboratory of Physical Chemistry of Solid Surfaces, College of Chemistry and Chemical Engineering, Xiamen University, Xiamen, Fujian, 361005, China*

*<sup>b</sup> State Key Laboratory of Supramolecular Structure and Materials, College of Chemistry, Jilin University, Changchun, Jilin, 130012, China*

**Content:**

**I . X-ray crystallographic analysis**

**II. Study on the relative Lewis acidity strength of the organoaluminum compounds**

**III. Study on the relative Lewis basicity strength of the P-ylide compounds**

**1. NBO analysis and computational details**

**2. <sup>31</sup>P NMR spectral analysis of P-ylide-1–P-ylide-5**

**3. <sup>31</sup>P NMR spectral analysis on reactions of P-ylide-1–P-ylide-5 each with AlMe(BHT)<sub>2</sub>**

**4. <sup>31</sup>P NMR spectral analysis on reactions of P-ylide-1–P-ylide-5 each with MMA AlMe(BHT)<sub>2</sub>**

**IV. Some other polymerization results**

**V. Other collected MALDI-TOF MS spectra**

**VI. Collected NMR (<sup>1</sup>H and <sup>31</sup>P) spectra**

**VII. References**

## I. X-ray crystallographic analysis

Crystallographic data of compounds LP-1, 2 LP-2 2 C<sub>7</sub>H<sub>8</sub>, LP-3 C<sub>7</sub>H<sub>8</sub>, LPM-3 C<sub>6</sub>H<sub>6</sub>, and LPM-5 0.5 C<sub>7</sub>H<sub>8</sub> were all collected on XtaLAB Synergy, Dualflex, HyPix diffractometer (Cu-K $\alpha$  radiation,  $\lambda = 1.54184 \text{ \AA}$ ). Absorption corrections were applied by using the spherical harmonics program (multi-scan type). All structures were solved by direct methods (SHELXS-2015)<sup>1</sup> and refined against  $F^2$  using SHELXL-2017/1.<sup>2</sup> In general, the non-hydrogen atoms were located by difference Fourier synthesis and refined anisotropically, and hydrogen atoms were included using a riding model with  $U_{\text{iso}}$  tied to the  $U_{\text{iso}}$  of the parent atoms unless otherwise specified. In 2 LP-2 2 C<sub>7</sub>H<sub>8</sub>, two independent molecules of LP-2 were disclosed. One of the two toluene solvent molecules was disordered, which was refined into two parts of C(110)C(111)C(112)C(113)C(114)C(115)C(116) (0.57222) and C(7A)C(1A)C(2A)C(3A)-C(4A)C(5A)C(6A) (0.42778) upon treatment by the PART method. In LP-3 C<sub>7</sub>H<sub>8</sub>, the toluene solvent molecule was disordered, which was refined into two parts of C(53)C(54)C(55)C(56)C(57)C(58)C(59) (0.34621) and C(53A)C(54A)C(55A)C(56A)C(57A)C(58A)C(59A) (0.65379) upon treatment by the PART method. In LPM-3 C<sub>6</sub>H<sub>6</sub>, the ethyl group was disordered that was treated by the PART method and refined into two parts C(5)C(6) and C(5A)C(6A) with the respective occupancies of 0.81371 and 0.18629. The C<sub>6</sub>H<sub>6</sub> solvent molecule was seriously disordered and treated by the PART method and refined into three parts C(61)C(62)C(63)C(64)C(65)C(66) (0.25), C(61A)C(62A)C(63A)C(64A)-C(65A)C(66A) (0.50), and C(61B)C(62B)C(63B)C(64B)C(65B)C(66B) (0.25), where C(61B)C(62B)-C(63B)C(64B)C(65B)C(66B) were not able to be performed by the geometric H-atom addition. In LPM-5 0.5 C<sub>7</sub>H<sub>8</sub>, two independent toluene solvent molecules were disclosed both of 0.25 moiety. A summary of cell parameters, data collection, and structure solution and refinements is given in Table S1.

**Table S1.** Crystal data and refinements<sup>a</sup>

|                                                     | LP-1                                                              | 2 LP-2 2 C <sub>7</sub> H <sub>8</sub>                                          |
|-----------------------------------------------------|-------------------------------------------------------------------|---------------------------------------------------------------------------------|
| CCDC number                                         | 2232557                                                           | 2232558                                                                         |
| formula                                             | C <sub>50</sub> H <sub>66</sub> AlO <sub>2</sub> P                | C <sub>116</sub> H <sub>152</sub> Al <sub>2</sub> O <sub>4</sub> P <sub>2</sub> |
| formula weight                                      | 756.98                                                            | 1726.28                                                                         |
| crystal system                                      | orthorhombic                                                      | triclinic                                                                       |
| space group                                         | <i>Pbca</i>                                                       | <i>P</i> -1                                                                     |
| <i>a</i> /Å                                         | 17.4083(3)                                                        | 15.9438(4)                                                                      |
| <i>b</i> /Å                                         | 18.0287(4)                                                        | 17.9944(3)                                                                      |
| <i>c</i> /Å                                         | 28.2153(5)                                                        | 18.5158(4)                                                                      |
| <i>α</i> /deg                                       | 90                                                                | 73.892(2)                                                                       |
| <i>β</i> /deg                                       | 90                                                                | 88.976(2)                                                                       |
| <i>γ</i> /deg                                       | 90                                                                | 88.672(2)                                                                       |
| <i>V</i> /Å <sup>3</sup>                            | 8855.3(3)                                                         | 5101.88(19)                                                                     |
| <i>Z</i>                                            | 8                                                                 | 2                                                                               |
| $\rho_{\text{calcd}}/\text{g}\cdot\text{cm}^{-3}$   | 1.136                                                             | 1.124                                                                           |
| $\mu/\text{mm}^{-1}$                                | 1.016                                                             | 0.939                                                                           |
| <i>F</i> (000)                                      | 3280                                                              | 1872                                                                            |
| crystal size/mm <sup>3</sup>                        | 0.32x0.28x0.20                                                    | 0.20x0.20x0.10                                                                  |
| $\theta$ range/deg                                  | 3.13–70.00                                                        | 2.48–58.78                                                                      |
| index ranges                                        | –21 ≤ <i>h</i> ≤ 20<br>–21 ≤ <i>k</i> ≤ 21<br>–34 ≤ <i>l</i> ≤ 28 | –17 ≤ <i>h</i> ≤ 17<br>–13 ≤ <i>k</i> ≤ 19<br>–17 ≤ <i>l</i> ≤ 20               |
| collected data                                      | 42986                                                             | 46473                                                                           |
| unique data                                         | 8359 ( <i>R</i> <sub>int</sub> = 0.0239)                          | 14312 ( <i>R</i> <sub>int</sub> = 0.0197)                                       |
| completeness to $\theta$                            | 99.5%                                                             | 98.1%                                                                           |
| data/restraints/parameters                          | 8359/0/510                                                        | 14312/198/1191                                                                  |
| GOF on <i>F</i> <sup>2</sup>                        | 1.031                                                             | 1.016                                                                           |
| final <i>R</i> indices [ <i>I</i> > 2σ( <i>I</i> )] | <i>R</i> <sub>1</sub> = 0.0345<br><i>wR</i> <sub>2</sub> = 0.0924 | <i>R</i> <sub>1</sub> = 0.0378<br><i>wR</i> <sub>2</sub> = 0.0970               |
| <i>R</i> indices (all data)                         | <i>R</i> <sub>1</sub> = 0.0367<br><i>wR</i> <sub>2</sub> = 0.0940 | <i>R</i> <sub>1</sub> = 0.0405<br><i>wR</i> <sub>2</sub> = 0.0987               |
| Largest diff peak/hole (e·Å <sup>-3</sup> )         | 0.350/–0.366                                                      | 0.520/–0.373                                                                    |

<sup>a</sup>All data were collected at 173(2) K.  $R_1 = \frac{\sum(|F_o| - |F_c|)}{\sum|F_o|}$ ,  $wR_2 = \left\{ \frac{\sum[w(F_o^2 - F_c^2)^2]}{\sum[w(F_o^2)^2]} \right\}^{1/2}$ ,  $\text{GOF} = \left\{ \frac{\sum[w(F_o^2 - F_c^2)^2]}{(N_o - N_p)} \right\}^{1/2}$ .

(continued)

|                                                   | LP-3 C <sub>7</sub> H <sub>8</sub>                                   | LPM-3 C <sub>6</sub> H <sub>6</sub>                                  | LPM-5 0.5 C <sub>7</sub> H <sub>8</sub>                             |
|---------------------------------------------------|----------------------------------------------------------------------|----------------------------------------------------------------------|---------------------------------------------------------------------|
| CCDC number                                       | 2232559                                                              | 2232560                                                              | 2232561                                                             |
| formula                                           | C <sub>59</sub> H <sub>78</sub> AlO <sub>2</sub> P                   | C <sub>63</sub> H <sub>82.5</sub> AlO <sub>4</sub> P                 | C <sub>60.5</sub> H <sub>82</sub> AlO <sub>4</sub> P                |
| formula weight                                    | 877.16                                                               | 961.74                                                               | 931.21                                                              |
| crystal system                                    | monoclinic                                                           | triclinic                                                            | orthorhombic                                                        |
| space group                                       | <i>P</i> 2(1)/ <i>c</i>                                              | <i>P</i> -1                                                          | <i>Pbca</i>                                                         |
| <i>a</i> /Å                                       | 18.8537(3)                                                           | 12.6448(2)                                                           | 12.9446(4)                                                          |
| <i>b</i> /Å                                       | 15.5489(2)                                                           | 15.3492(2)                                                           | 14.8659(6)                                                          |
| <i>c</i> /Å                                       | 18.2578(3)                                                           | 16.4061(2)                                                           | 17.9817(7)                                                          |
| <i>α</i> /deg                                     | 90                                                                   | 67.9540(10)                                                          | 109.495(4)                                                          |
| <i>β</i> /deg                                     | 103.1110(10)                                                         | 89.1970(10)                                                          | 92.100(3)                                                           |
| <i>γ</i> /deg                                     | 90                                                                   | 74.8020(10)                                                          | 107.404(3)                                                          |
| <i>V</i> /Å <sup>3</sup>                          | 5212.83(14)                                                          | 2835.47(7)                                                           | 3076.5(2)                                                           |
| <i>Z</i>                                          | 4                                                                    | 2                                                                    | 2                                                                   |
| $\rho_{\text{calcd}}/\text{g}\cdot\text{cm}^{-3}$ | 1.118                                                                | 1.126                                                                | 1.005                                                               |
| $\mu/\text{mm}^{-1}$                              | 0.926                                                                | 0.919                                                                | 0.833                                                               |
| <i>F</i> (000)                                    | 1904                                                                 | 1041                                                                 | 1010                                                                |
| crystal size/mm <sup>3</sup>                      | 0.32x0.26x0.15                                                       | 0.20x0.20x0.20                                                       | 0.10x0.10x0.05                                                      |
| $\theta$ range/deg                                | 2.41–65.93                                                           | 2.92–69.98                                                           | 2.64–58.85                                                          |
| index ranges                                      | $-22 \leq h \leq 14$<br>$-18 \leq k \leq 18$<br>$-21 \leq l \leq 21$ | $-15 \leq h \leq 14$<br>$-18 \leq k \leq 18$<br>$-19 \leq l \leq 19$ | $-7 \leq h \leq 14$<br>$-16 \leq k \leq 15$<br>$-19 \leq l \leq 19$ |
| collected data                                    | 60880                                                                | 66703                                                                | 25538                                                               |
| unique data                                       | 8966 ( $R_{\text{int}} = 0.0236$ )                                   | 10645 ( $R_{\text{int}} = 0.0244$ )                                  | 8588 ( $R_{\text{int}} = 0.0432$ )                                  |
| completeness to $\theta$                          | 98.9 %                                                               | 99.1 %                                                               | 97.3 %                                                              |
| data/restraints/parameters                        | 8966/576/624                                                         | 10645/565/734                                                        | 8588/576/690                                                        |
| GOF on $F^2$                                      | 1.055                                                                | 1.023                                                                | 1.130                                                               |
| final <i>R</i> indices [ $I > 2\sigma(I)$ ]       | $R_1 = 0.0533$<br>$wR_2 = 0.1449$                                    | $R_1 = 0.0343$<br>$wR_2 = 0.0907$                                    | $R_1 = 0.0969$<br>$wR_2 = 0.2643$                                   |
| <i>R</i> indices (all data)                       | $R_1 = 0.0553$<br>$wR_2 = 0.1466$                                    | $R_1 = 0.0351$<br>$wR_2 = 0.0913$                                    | $R_1 = 0.1128$<br>$wR_2 = 0.2786$                                   |
| Largest diff peak/hole (e·Å <sup>-3</sup> )       | 0.861/–0.687                                                         | 0.364/–0.296                                                         | 1.027/–0.397                                                        |

<sup>a</sup>All data were collected at 173(2) K.  $R_1 = \sum(|F_o| - |F_c|) / \sum|F_o|$ ,  $wR_2 = \{\sum[w(F_o^2 - F_c^2)^2 / \sum[w(F_o^2)^2]]\}^{1/2}$ ,  $\text{GOF} = \{\sum[w(F_o^2 - F_c^2)^2] / (N_o - N_p)\}^{1/2}$ .

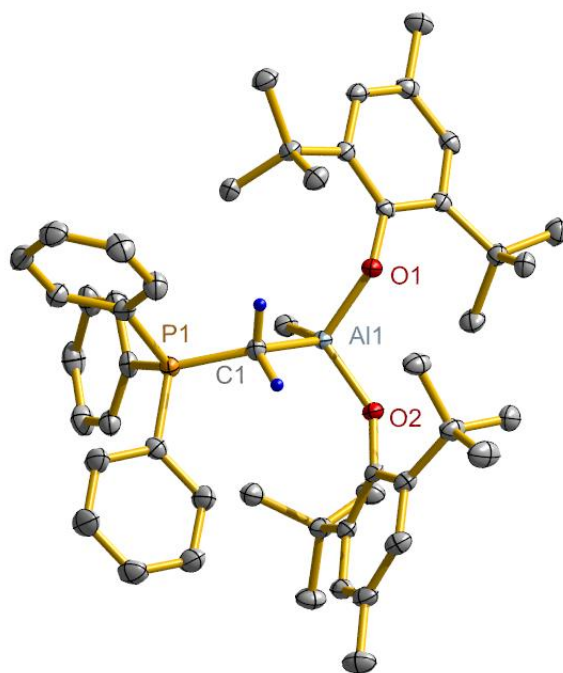

**Fig. S1** X-ray crystal structure of LP-1 with thermal ellipsoids at 50% probability level. The hydrogen atoms except for the CH<sub>2</sub> are omitted for clarity. Selected bond lengths (Å) and angles (°): P1–C1 1.7767(12), C1–Al1 2.0781(13), Al1–O1 1.7682(8), Al1–O2 1.7756(8); P1–C1–Al1 130.96(7), O1–Al1–O2 108.32(4).

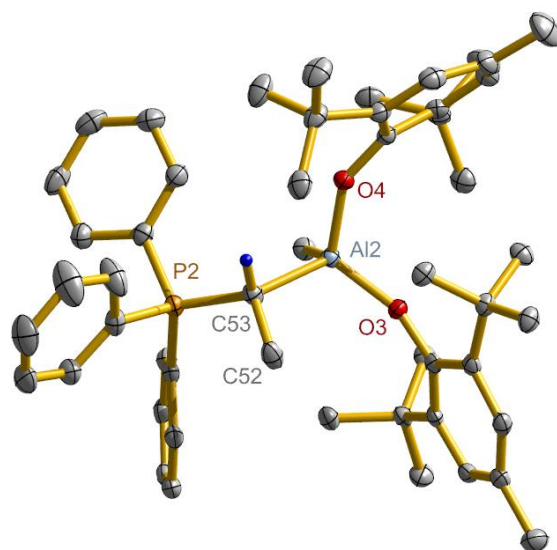

**Fig. S2** X-ray crystal structure of another independent molecule of LP-2 with thermal ellipsoids at 50% probability level. The hydrogen atoms except for the CH are omitted for clarity. Selected bond lengths (Å) and angles (°): P2–C53 1.7805(17), C53–Al2 2.0949(18), Al2–O3 1.7811(12), Al2–O4 1.7569(12); P2–C53–Al2 122.14(9), O3–Al2–O4 112.24(6).

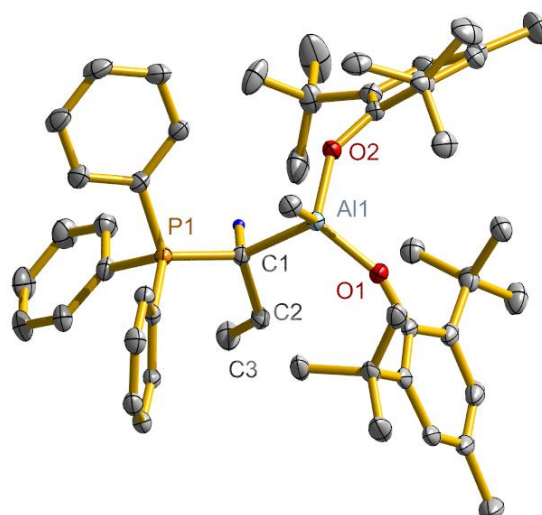

**Fig. S3** X-ray crystal structure of LP-3 with thermal ellipsoids at 50% probability level. The hydrogen atoms except for the CH are omitted for clarity. Selected bond lengths (Å) and angles (°): P1–C1 1.7835(19), C1–Al1 2.1011(19), Al1–O1 1.7601(14), Al1–O2 1.7765(14); P1–C1–Al1 120.86(10), O1–Al1–O2 110.50(7).

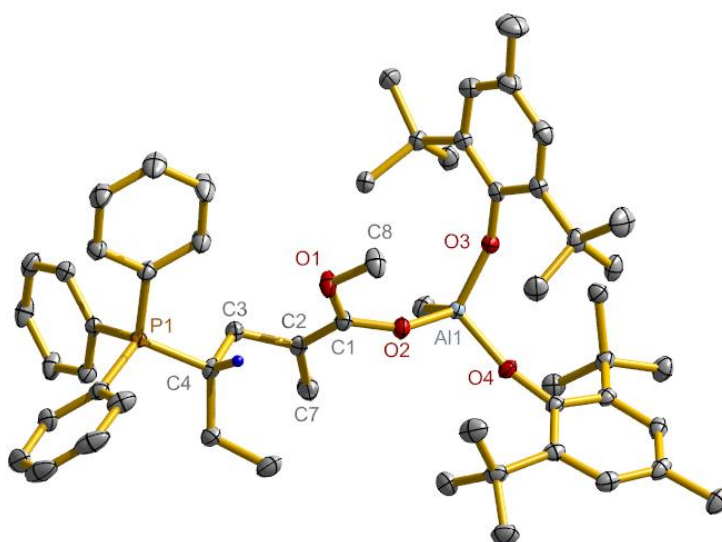

**Fig. S4** X-ray crystal structure of LPM-3 with thermal ellipsoids at 50% probability level. The hydrogen atoms are omitted for clarity. Selected bond lengths (Å) and angles (°): P1–C4 1.8305(11), C4–C3 1.5561(16), C3–C2 1.5108(15), C2–C7 1.5017(17), C2–C1 1.3389(17), C1–O1 1.3880(14), C1–O2 1.3186(14), O1–C8 1.4294(15), Al1–O2 1.7777(8), Al1–O3 1.7531(8), Al1–O4 1.7475(8); P1–C4–C3 109.00(7), C3–C2–C7 117.25(10), O1–C1–O2 115.66(10), O3–Al1–O4 110.32(4), O2–Al1–O3 106.27(4), O2–Al1–O4 105.14(4).

## II. Study on the relative Lewis acidity strength of the organoaluminum compounds

### The Gutmann–Beckett method

The method uses comparison of the  $^{31}\text{P}$  NMR resonances of the  $\text{Et}_3\text{PO}$  standard *versus*  $\text{Et}_3\text{PO}$  LA to determine the Lewis acidity strength of the Al-based LAs, where  $\text{Et}_3\text{PO} \cdot \text{Al}(\text{C}_6\text{F}_5)_3$  was settled as a comparator (100%) instead of  $\text{Et}_3\text{PO} \cdot \text{B}(\text{C}_6\text{F}_5)_3$ .<sup>3,4</sup> The same concentration solutions of  $\text{Et}_3\text{PO}$  and  $\text{Et}_3\text{PO}$  LA each by 0.025 mmol in  $\text{C}_6\text{D}_6$  (0.5 mL) in a 2-mL NMR tube were employed for the  $^{31}\text{P}$  NMR measurement, where  $\text{Et}_3\text{PO}$  LA was obtained by *in-situ* mixing  $\text{Et}_3\text{PO}$  and equivalent LA. The solution obtained was kept after 30 min at room temperature (298 K) prior to test.

**Table S2.** The relative Lewis acidity data obtained through the Gutmann–Beckett method

| compound                                                       | $^{31}\text{P}\{\text{H}\}$<br>( $\delta/\text{ppm}$ ) | $\Delta\delta$ values relative to<br>that of free $\text{Et}_3\text{PO}$ ( $\delta/\text{ppm}$ ) | relative Lewis<br>acidity (%) |
|----------------------------------------------------------------|--------------------------------------------------------|--------------------------------------------------------------------------------------------------|-------------------------------|
| $\text{Et}_3\text{PO}$                                         | 46.0                                                   | 0                                                                                                | –                             |
| $\text{Et}_3\text{PO} \cdot \text{Al}(\text{C}_6\text{F}_5)_3$ | 75.3                                                   | 29.3                                                                                             | 100%                          |
| $\text{Et}_3\text{PO} \cdot \text{AlMe}(\text{BHT})_2$         | 69.5                                                   | 23.5                                                                                             | 80%                           |
| $\text{Et}_3\text{PO} \cdot \text{AlEt}(\text{BHT})_2$         | 69.3                                                   | 23.3                                                                                             | 79%                           |
| $\text{Et}_3\text{PO} \cdot \text{Al}i\text{Bu}(\text{BHT})_2$ | 69.3                                                   | 23.3                                                                                             | 79%                           |
| $\text{Et}_3\text{PO} \cdot \text{Al}i\text{Bu}_2(\text{BHT})$ | 66.2                                                   | 20.2                                                                                             | 69%                           |

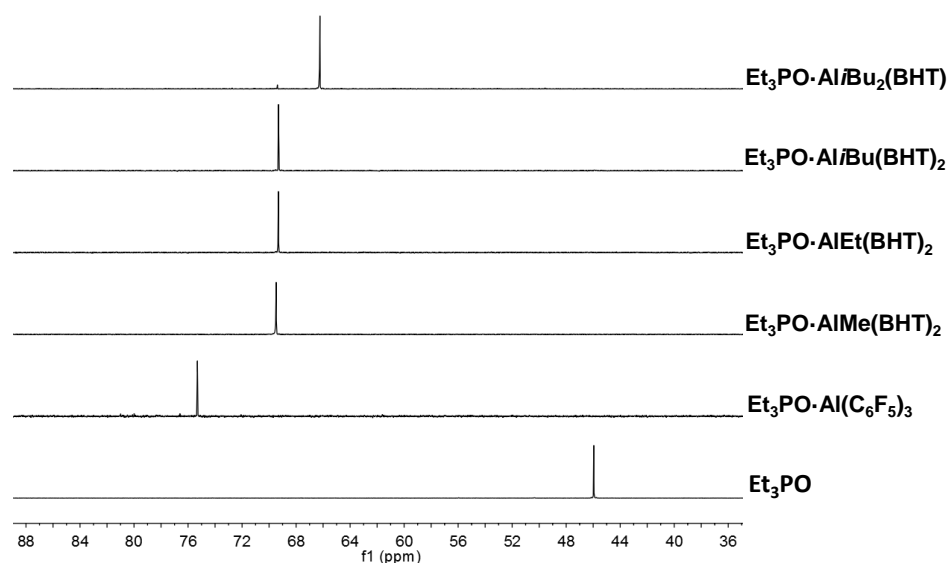

**Fig. S5** The  $^{31}\text{P}$  NMR spectra profile for  $\text{Et}_3\text{PO}$  and  $\text{Et}_3\text{PO}$  LAs measured in  $\text{C}_6\text{D}_6$  at 298 K.

## III. Study on the relative Lewis basicity strength of the P-ylide compounds

### 1. NBO analysis and computational details

Density functional theory calculations were performed using M06-2X<sup>5</sup> with the 6-311+G(3d,2p) basis sets to all atoms of the P-ylide molecules.<sup>6,7</sup> Geometries were fully optimized, and vibrational frequencies were calculated to ensure no other imaginary frequency at a native minimum of the molecules studied. The charge analyses were performed with the natural bond orbital (NBO) scheme.<sup>8–13</sup>

All calculations were carried out using the Gaussian 09 package.<sup>14</sup>

The charge distributions at the atoms for the P=C bond of the P-ylides were calculated (Table S3), which indicate that the P-atom holds the positive charge by 1.593, 1.613, 1.619, 1.635, and 1.631 whereas the C-atom the negative charge by -1.219, -0.984, -0.980, -0.922, and -0.785 corresponding from P-ylide-1 to P-ylide-5, respectively. This implies that the nucleophilic reactivity is settled at the C-atom, with strength in better sequence decreasing from P-ylide-1 to P-ylide-5.

**Table S3.** The charge distributions calculated at the atoms for the P=C bond of the P-ylides

| Ph <sub>3</sub> P=CR <sub>2</sub> |                |       |        |
|-----------------------------------|----------------|-------|--------|
| compound                          | R <sub>2</sub> | P     | C      |
| P-ylide-1                         | H,H            | 1.593 | -1.219 |
| P-ylide-2                         | H,Me           | 1.613 | -0.984 |
| P-ylide-3                         | H,Et           | 1.619 | -0.980 |
| P-ylide-4                         | H,Ph           | 1.635 | -0.922 |
| P-ylide-5                         | Me,Me          | 1.631 | -0.785 |

## 2. <sup>31</sup>P NMR spectral analysis of P-ylide-1–P-ylide-5

The <sup>31</sup>P NMR spectra analysis show resonances at  $\delta$  21.20, 14.57, 12.31, 7.79, and 9.86 corresponding from P-ylide-1 to P-ylide-5, respectively. These data indicate variation of the phosphorus resonances of the five P-ylides due to change of the substituents at P=C carbon atom, as appears little influence direct to the nucleophilic reactivity strength at the C-atom.

**Table S4.** The <sup>31</sup>P NMR data measured for P-ylides

| compound  | <sup>31</sup> P{ <sup>1</sup> H} NMR ( $\delta$ /ppm) |
|-----------|-------------------------------------------------------|
| P-ylide-1 | 21.20                                                 |
| P-ylide-2 | 14.57                                                 |
| P-ylide-3 | 12.31                                                 |
| P-ylide-4 | 7.79                                                  |
| P-ylide-5 | 9.86                                                  |



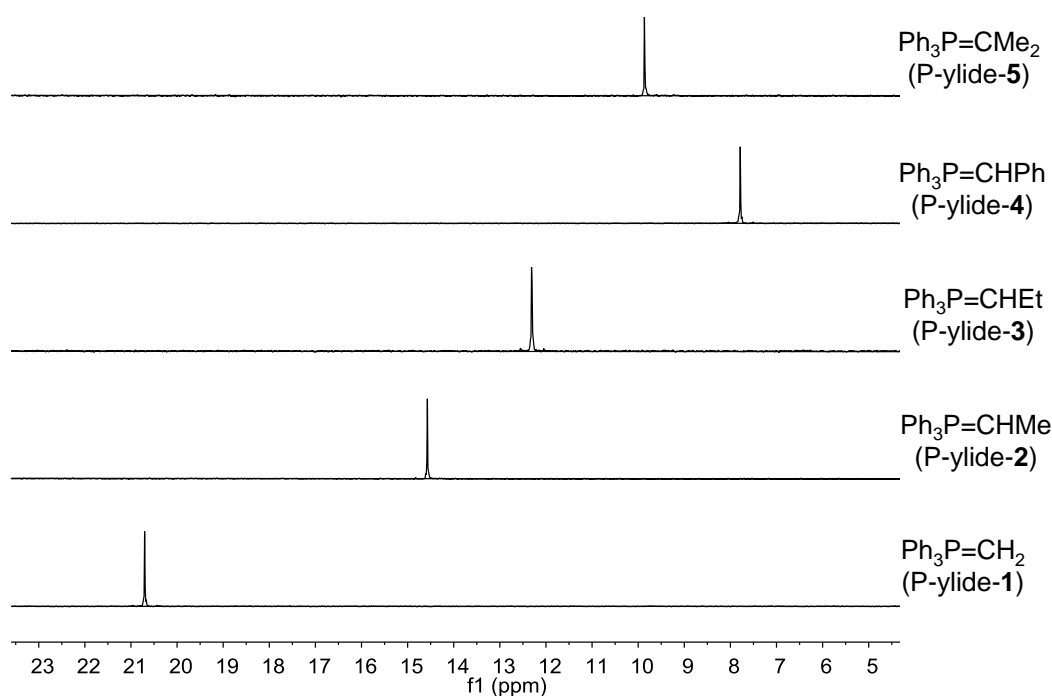

**Fig. S6** The  $^{31}\text{P}$  NMR spectra profile for P-ylide-1–P-ylide-5 measured in  $\text{C}_6\text{D}_6$  at 298 K.

### 3. $^{31}\text{P}$ NMR spectral analysis on reactions of P-ylide-1–P-ylide-5 each with $\text{AlMe}(\text{BHT})_2$

As seen from Fig. S7, reactions of P-ylide-1–P-ylide-3 each with  $\text{AlMe}(\text{BHT})_2$  resulted in formation of LP-1–LP-3. No reaction happened between P-ylide-4 and  $\text{AlMe}(\text{BHT})_2$  whereas complex reaction occurred for P-ylide-5 and  $\text{AlMe}(\text{BHT})_2$ . The LP-1–LP-3 are of the classical Lewis pair (CLP) character whereas P-ylide-4 and  $\text{AlMe}(\text{BHT})_2$  form a frustrated Lewis pair (FLP). These results detect varied interactions between the P-ylides and  $\text{AlMe}(\text{BHT})_2$ .

**Table S5.** The  $^{31}\text{P}$  NMR data measured for reactions of P-ylide-1–P-ylide-5 with  $\text{AlMe}(\text{BHT})_2$

| reaction                                | $^{31}\text{P}\{^1\text{H}\}$ NMR ( $\delta/\text{ppm}$ )                                                                                           |
|-----------------------------------------|-----------------------------------------------------------------------------------------------------------------------------------------------------|
| P-ylide-1 + $\text{AlMe}(\text{BHT})_2$ | 32.00 (LP-1)                                                                                                                                        |
| P-ylide-2 + $\text{AlMe}(\text{BHT})_2$ | 37.01 (LP-2)                                                                                                                                        |
| P-ylide-3 + $\text{AlMe}(\text{BHT})_2$ | 35.11 (LP-3)                                                                                                                                        |
| P-ylide-4 + $\text{AlMe}(\text{BHT})_2$ | 7.79 (P-ylide-4)                                                                                                                                    |
| P-ylide-5 + $\text{AlMe}(\text{BHT})_2$ | 41.75 (27%, LP-5), 40.67 (2%, unknown), 39.32 (2%, unknown), 32.35 (15%, unknown), 30.87 (3%, unknown), 9.92 (10%, P-ylide-5), -5.36 (41%, unknown) |

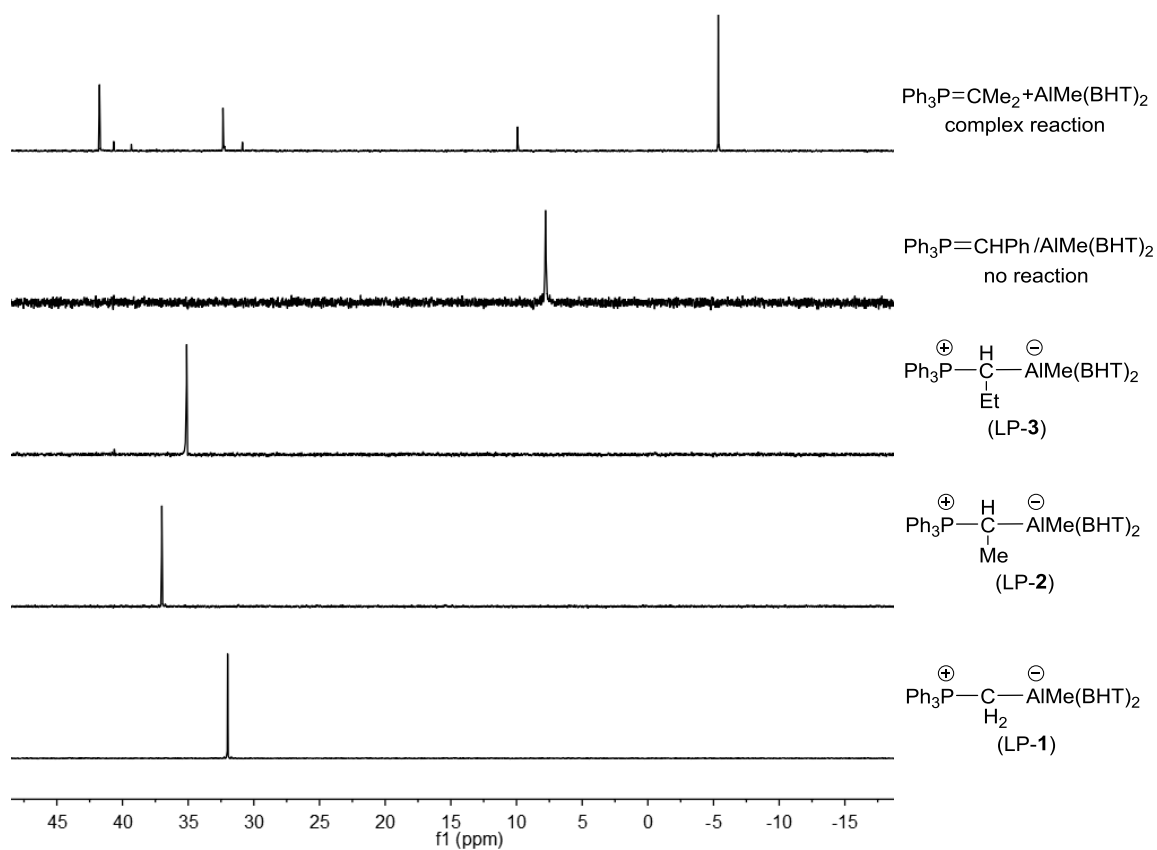

**Fig. S7** The  $^{31}\text{P}$  NMR spectra profile for reactions of P-ylide-1–P-ylide-5 with  $\text{AlMe}(\text{BHT})_2$  measured in  $\text{C}_6\text{D}_6$  at 298 K.

#### 4. $^{31}\text{P}$ NMR spectral analysis on reactions of P-ylide-1–P-ylide-5 each with MMA $\text{AlMe}(\text{BHT})_2$

As seen from Fig. S8 and Table S6, reaction of P-ylide-1 with MMA  $\text{AlMe}(\text{BHT})_2$  produced LPM-1 as minor part while LP-1 as the major one. Reactions of either P-ylide-2 or P-ylide-3 with  $\text{AlMe}(\text{BHT})_2$  gave completely LPM-2 or LPM-3. And reactions of P-ylide-4 and P-ylide-5 each with  $\text{AlMe}(\text{BHT})_2$  generated besides LPM-4 and LPM-5 the unknown species. These results detect influence due to change of the P-ylides.

**Table S6.** The  $^{31}\text{P}$  NMR data measured for reactions of P-ylide-1–P-ylide-5 each with MMA  $\text{AlMe}(\text{BHT})_2$

| reaction                                    | $^{31}\text{P}\{^1\text{H}\}$ NMR ( $\delta/\text{ppm}$ )                                 |
|---------------------------------------------|-------------------------------------------------------------------------------------------|
| P-ylide-1 + MMA $\text{AlMe}(\text{BHT})_2$ | 31.95 (80%, LP-1), 25.18 (4%, <i>cis</i> -LPM-1),<br>24.65 (16%, <i>trans</i> -LPM-1)     |
| P-ylide-2 + MMA $\text{AlMe}(\text{BHT})_2$ | 27.56 ( <i>trans</i> -LPM-2)                                                              |
| P-ylide-3 + MMA $\text{AlMe}(\text{BHT})_2$ | 29.42 (18%, <i>cis</i> -LPM-3), 28.77 (82%,<br><i>trans</i> -LPM-3)                       |
| P-ylide-4 + MMA $\text{AlMe}(\text{BHT})_2$ | 24.01 (12%, <i>cis</i> -LPM-4), 20.90 (69%,<br><i>trans</i> -LPM-4), -5.49 (19%, unknown) |
| P-ylide-5 + MMA $\text{AlMe}(\text{BHT})_2$ | 35.66 (95%, <i>trans</i> -LPM-5), -5.34 (5%,<br>unknown)                                  |

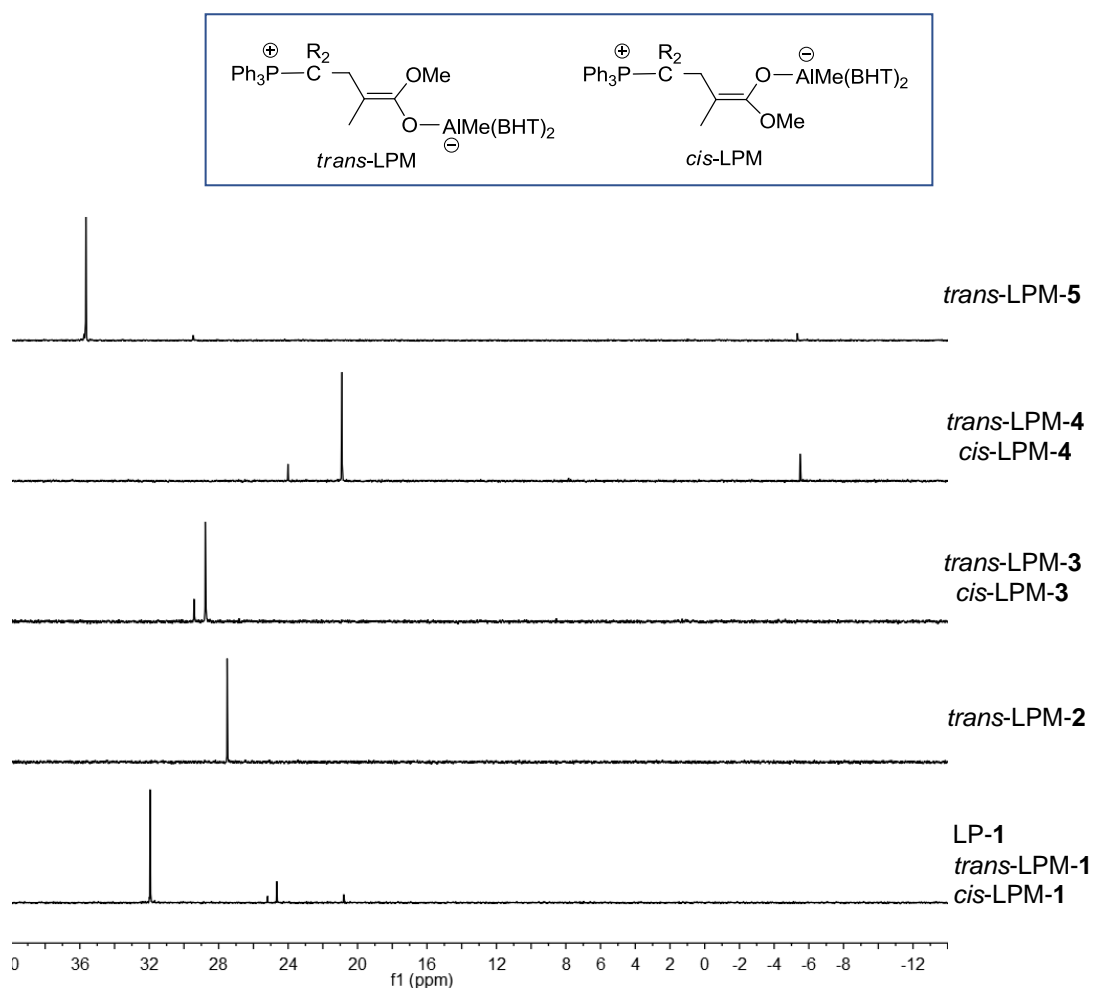

**Fig. S8** The  $^{31}\text{P}$  NMR spectra profile for reactions of P-ylide-1–P-ylide-5 each with MMA  $\text{AlMe}(\text{BHT})_2$  measured in  $\text{C}_6\text{D}_6$  at 298 K (Note: detailed assignments are seen in Figs S25, S27, S29, S31, and S33 in VI).

#### IV. Some other polymerization results

**Table S7.** The MMA polymerization results by using only the P-ylide initiators<sup>a</sup>

| Run | LB        | [MMA]:[LB] | <i>t</i> (h) | Conv. <sup>b</sup> (%) |
|-----|-----------|------------|--------------|------------------------|
| 1   | P-ylide-1 | 200:1      | 24           | 2.0                    |
| 2   | P-ylide-2 | 200:1      | 24           | 4.7                    |
| 3   | P-ylide-3 | 200:1      | 24           | 3.8                    |
| 4   | P-ylide-4 | 200:1      | 24           | 0                      |
| 5   | P-ylide-5 | 200:1      | 24           | 9.0                    |

<sup>a</sup>Conditions: MMA 4.6 mmol, toluene 5 mL, at 298 K. <sup>b</sup>Monomer conversion was calculated according to the <sup>1</sup>H NMR data measured.

**Table S8.** The copolymerization results by using the P-ylide-2/Al*i*Bu<sub>2</sub>(BHT) initiator system<sup>a</sup>

| run | [P-ylide-2]:[Al <i>i</i> Bu <sub>2</sub> (BHT)]:[M] | <i>t</i> (min) | Conv. <sup>b</sup> (%) | <i>M<sub>n</sub></i> <sup>c</sup> (kg/mol) | <i>D</i> <sup>c</sup> |
|-----|-----------------------------------------------------|----------------|------------------------|--------------------------------------------|-----------------------|
| 1   | 1:2:(200 MMA/200 MMA)                               | 5              | >99                    | 46.9                                       | 1.19                  |
| 2   | 1:2:(200 MMA/200 EMA)                               | 5              | >99                    | 53.2                                       | 1.18                  |
| 3   | 1:2:(200 MMA/200 BnMA)                              | 5              | >99                    | 83.8                                       | 1.05                  |
|     |                                                     |                |                        | 30.5                                       | 1.02                  |
| 4   | 1:2:(200 MMA/200 <i>n</i> BuMA)                     | 5              | >99                    | 76.6                                       | 2.28                  |

<sup>a</sup>Conditions: carried out at 298 K in toluene (10 mL); first monomer (MMA) 4.6 mmol, second monomer 4.6 mmol. <sup>b</sup>Monomer conversions were calculated according to <sup>1</sup>H NMR data measured. <sup>c</sup>*M<sub>n</sub>* and *D* determined by GPC relative to PMMA standards in THF.

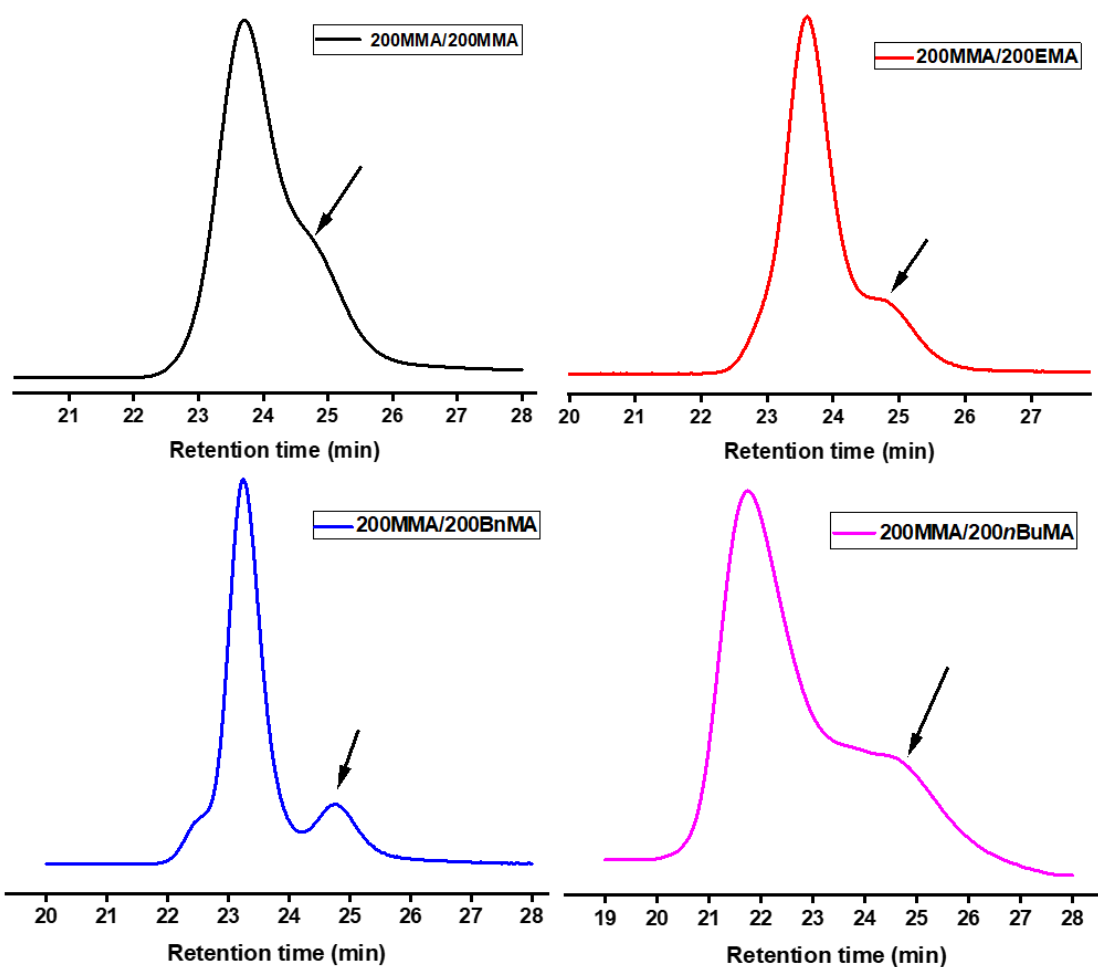

**Fig. S9** The GPC traces of PMMA samples obtained from chain-extension and copolymerization experiments by using the P-ylide-2/ $\text{Al}i\text{Bu}_2(\text{BHT})$  initiator system.

**Table S9.** The chain-extension polymerization results by using the P-ylide-2/ $\text{AlMe}(\text{BHT})_2$  initiator system<sup>a</sup>

| run | [P-ylide-2]:[AlMe(BHT) <sub>2</sub> ]:[M] | Conv. <sup>b</sup><br>(%) | $M_n^c$<br>(kg/mol) | $\mathcal{D}^c$ | $I^{*d}$ (%) |
|-----|-------------------------------------------|---------------------------|---------------------|-----------------|--------------|
| 1   | 1:2:(200 MMA)                             | >99                       | 31.7                | 1.18            | 64           |
| 2   | 1:2:(200 MMA/200 MMA)                     | >99                       | 51.4                | 1.16            | 78           |
| 3   | 1:2:(200 MMA/200 MMA/200 MMA)             | >99                       | 71.1                | 1.12            | 85           |

<sup>a</sup>Condition: carried out at 298 K in toluene; [MMA] = 0.92 M. <sup>b</sup>Monomer conversions were calculated according to <sup>1</sup>H NMR data measured. <sup>c</sup> $M_n$  and  $\mathcal{D}$  determined by GPC relative to PMMA standards in THF. <sup>d</sup>Initiator efficiency ( $I^*$ ) =  $M_n(\text{calcd})/M_n(\text{exptl})$ , where  $M_n(\text{calcd}) = [\text{MW}(\text{MMA})]([\text{MMA}]_0/[\text{I}]_0)$  (conversion %) + MW of chain-end groups.

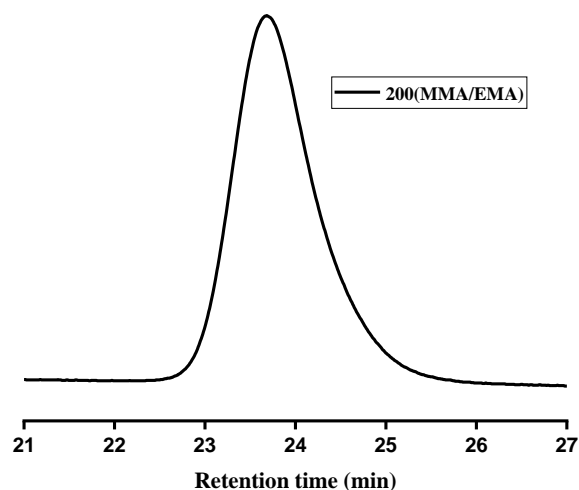

**Fig. S10** The GPC trace of the PMMA sample obtained from random copolymerization by using the P-ylide-2/AlMe(BHT)<sub>2</sub> initiator system (run 10, Table 2).

#### V. Other collected MALDI-TOF MS spectra

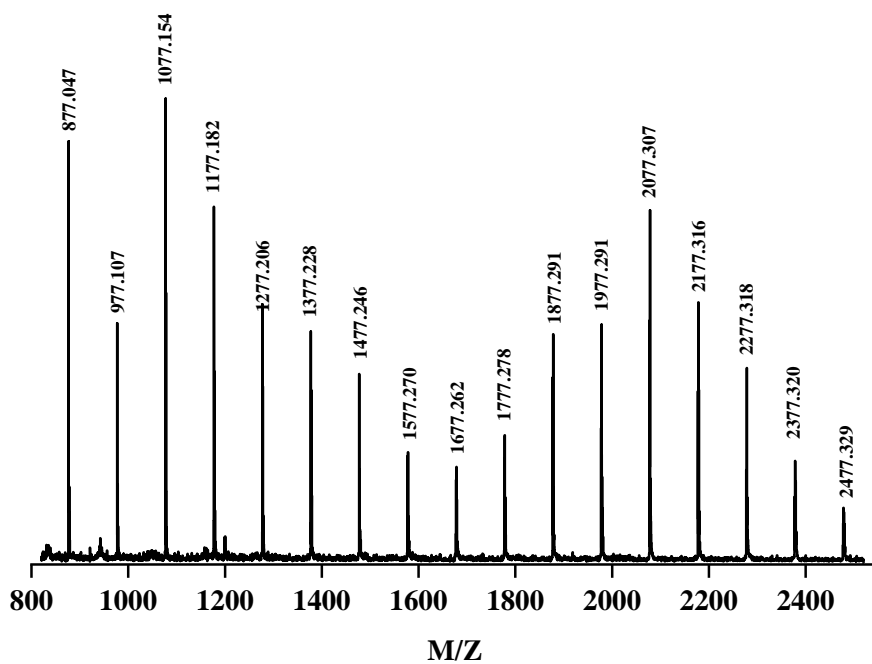

**Fig. S11** MALDI-TOF MS spectrum of the low-MW PMMA sample produced by P-ylide-1/AlMe(BHT)<sub>2</sub> in toluene at 298 K.

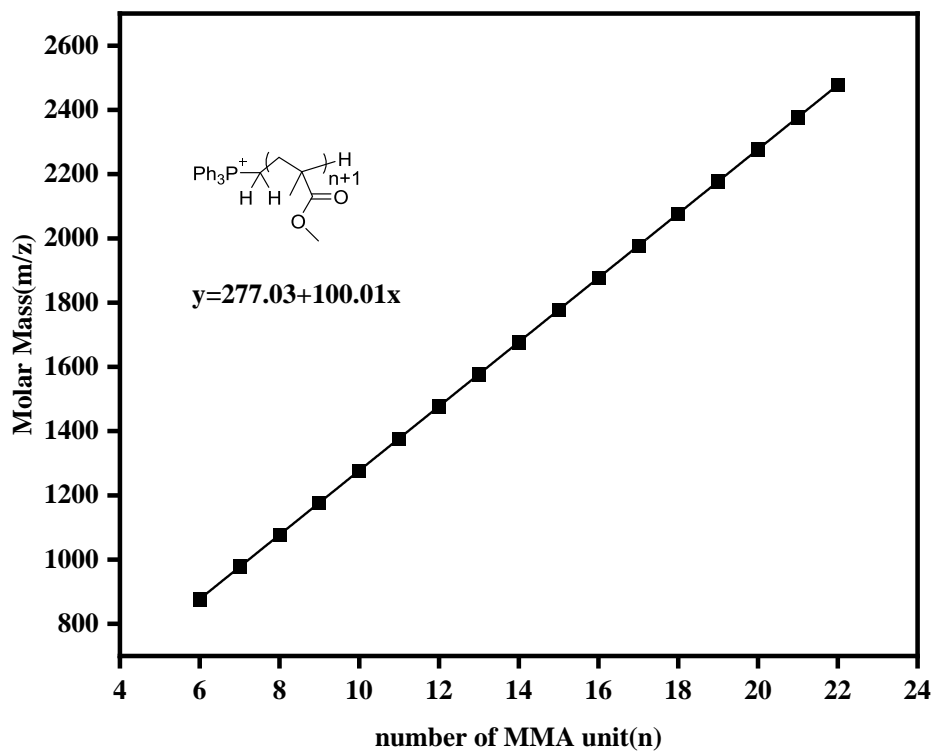

Fig. S12 Plot of  $m/z$  values from Fig. 11 vs the number of MMA repeat units ( $n$ ).

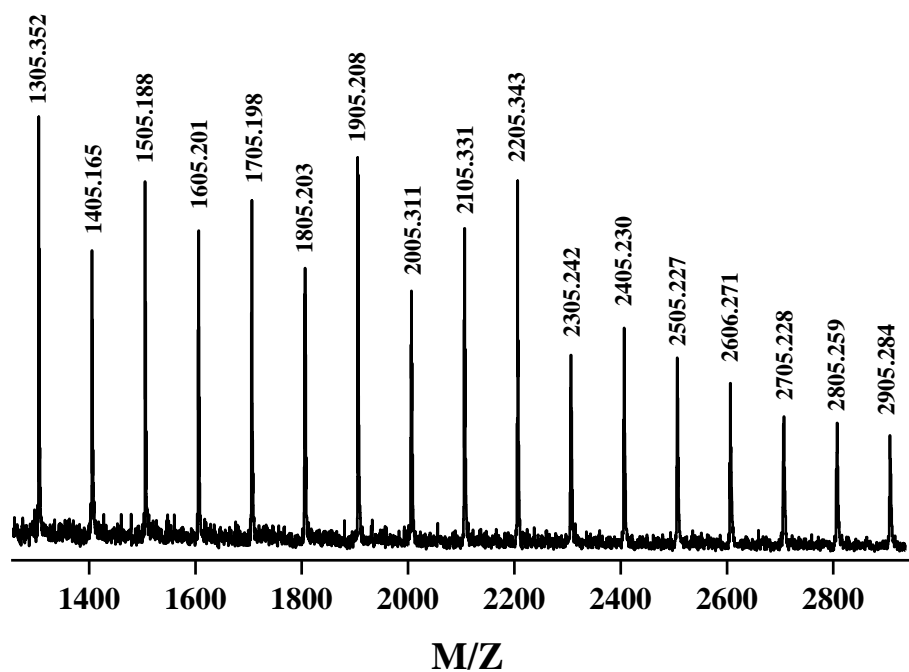

Fig. S13 MALDI-TOF MS spectrum of the low-MW PMMA sample produced by P-ylide-3/AlMe(BHT)<sub>2</sub> in toluene at 298 K.

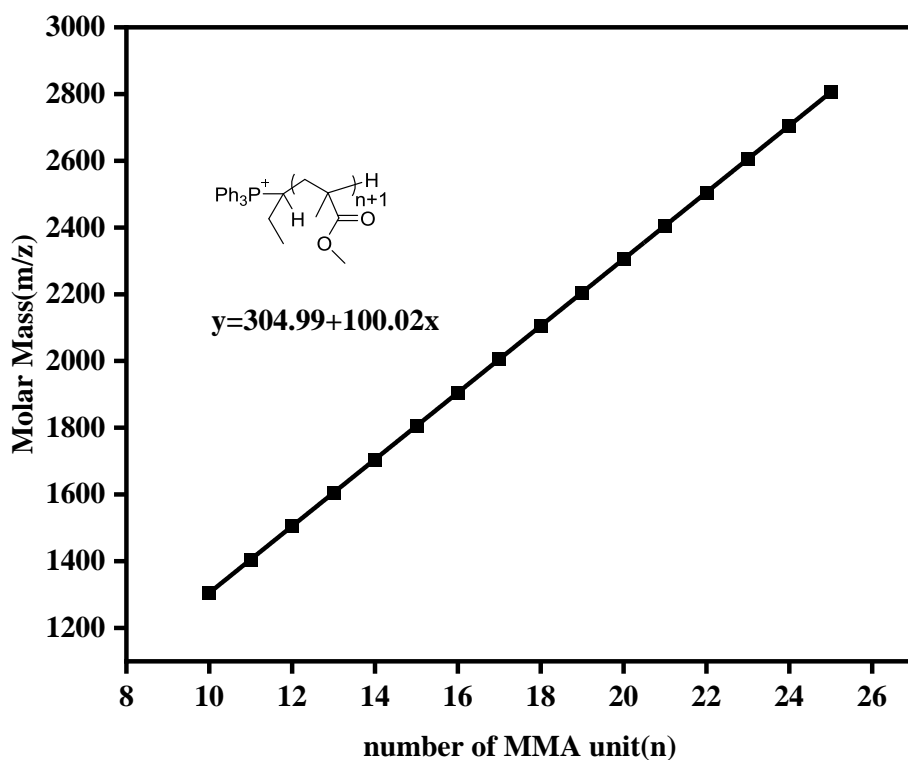

Fig. S14 Plot of  $m/z$  values from Fig. S13 vs the number of MMA repeat units ( $n$ ).

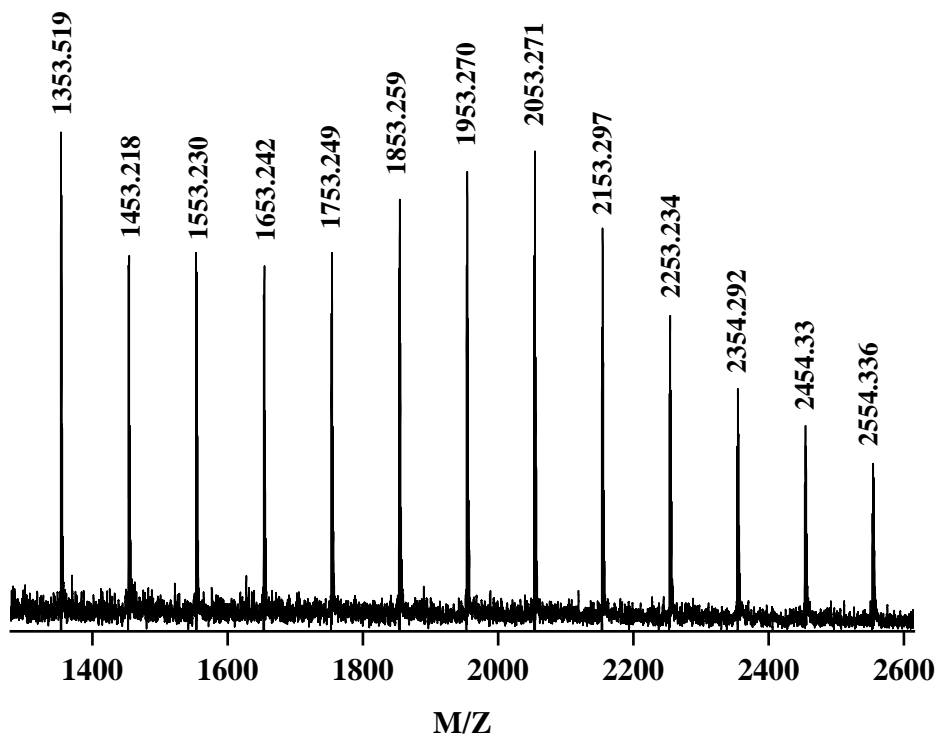

Fig. S15 MALDI-TOF MS spectrum of the low-MW PMMA sample produced by P-ylide-4/AlMe(BHT)<sub>2</sub> in toluene at 298 K.



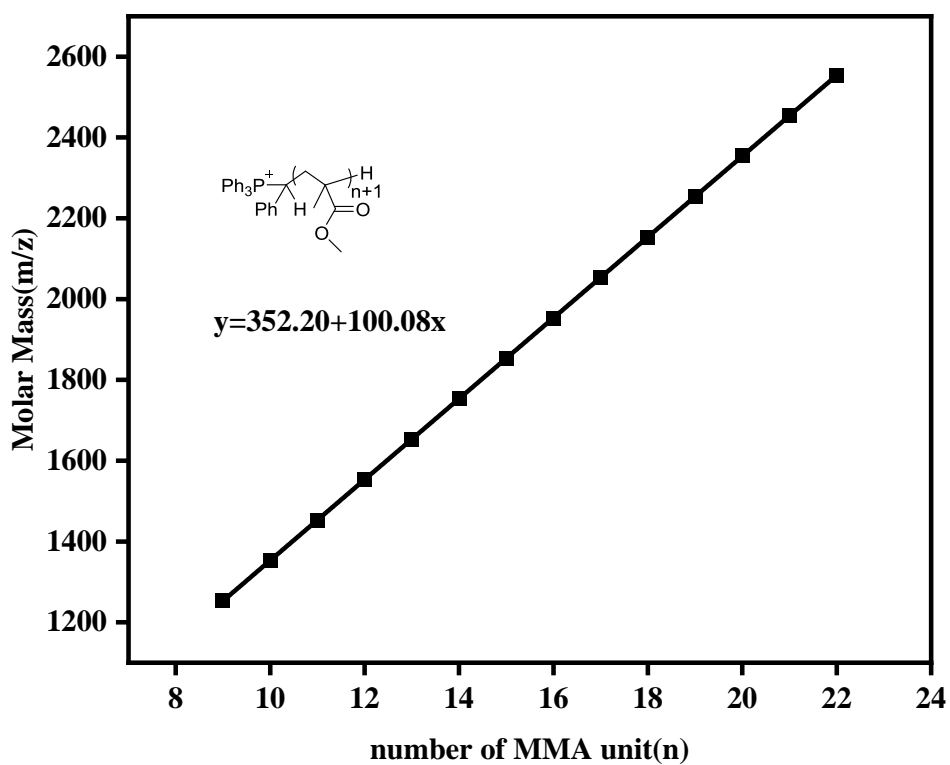

Fig. S16 Plot of  $m/z$  values from Fig. S15 vs the number of MMA repeat units ( $n$ ).

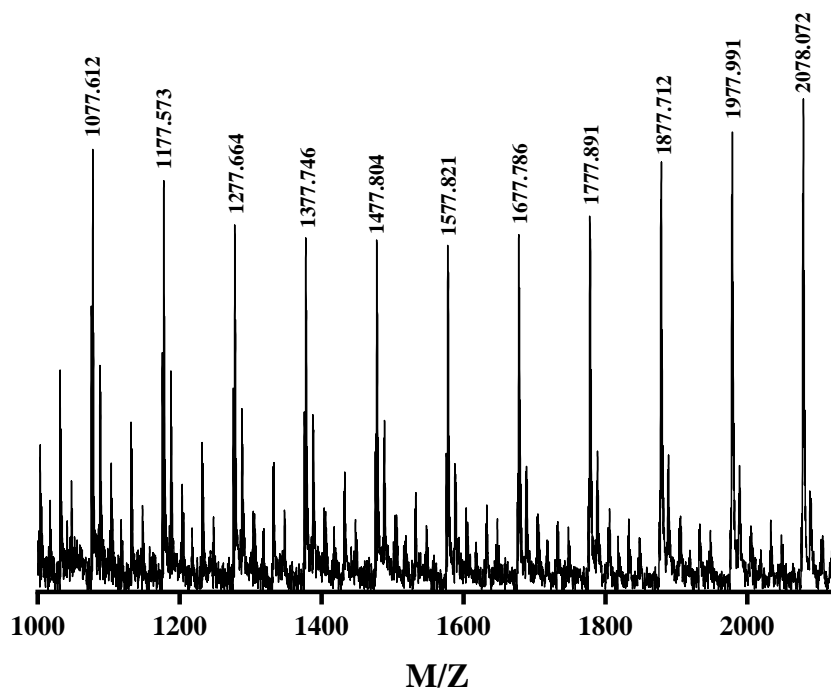

Fig. S17 MALDI-TOF MS spectrum of the low-MW PMMA sample produced by P-ylide-1/Al*i*Bu<sub>2</sub>(BHT) in toluene at 298 K.

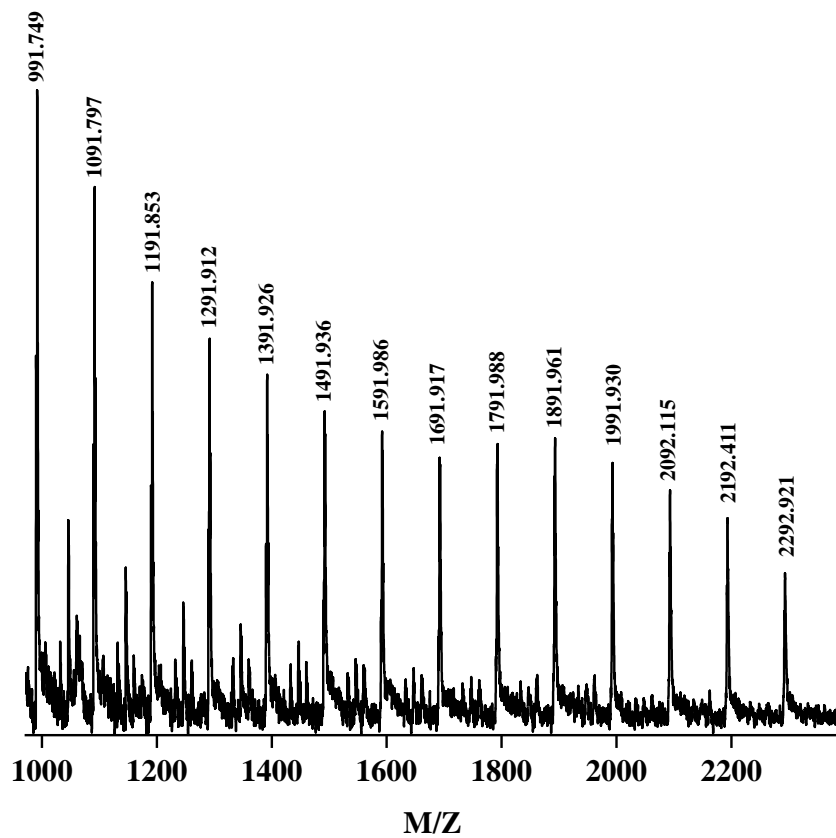

**Fig. S18** MALDI-TOF MS spectrum of the low-MW PMMA sample produced by P-ylide-2/Al*i*Bu<sub>2</sub>(BHT) in toluene at 298 K.

## VI. Collected NMR ( $^1\text{H}$ and $^{31}\text{P}$ ) spectra

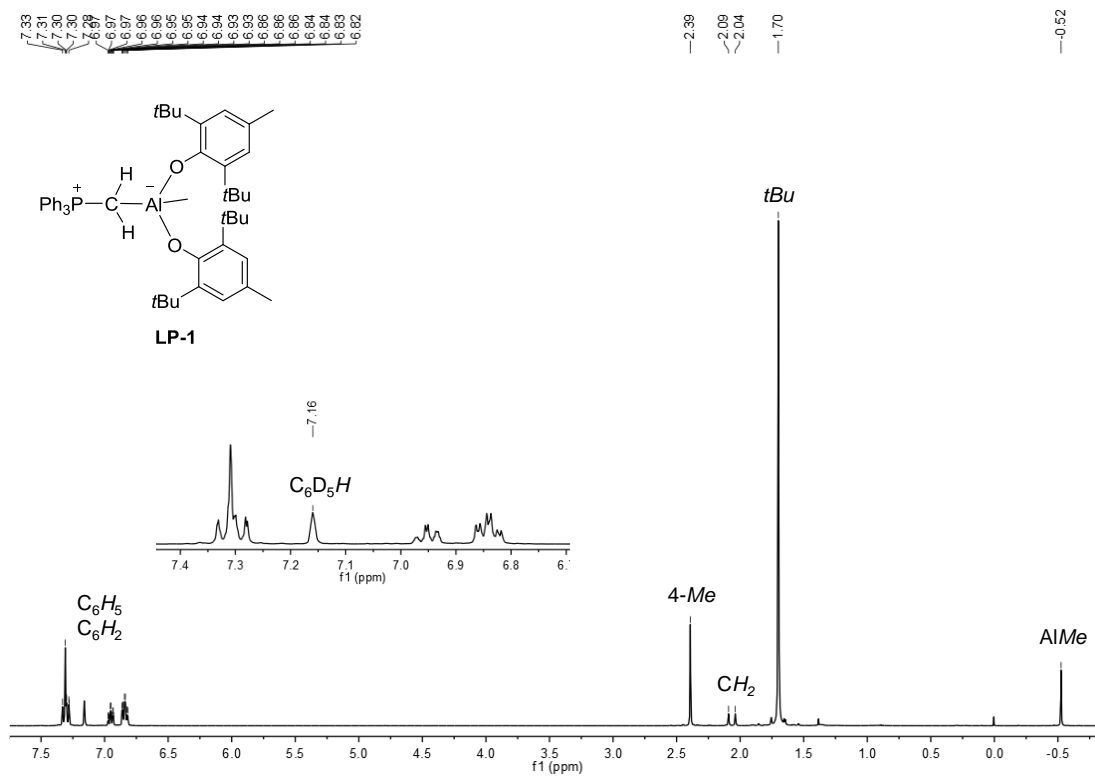

**Fig. S19**  $^1\text{H}$  NMR spectrum of LP-1 in  $\text{C}_6\text{D}_6$  at 298 K

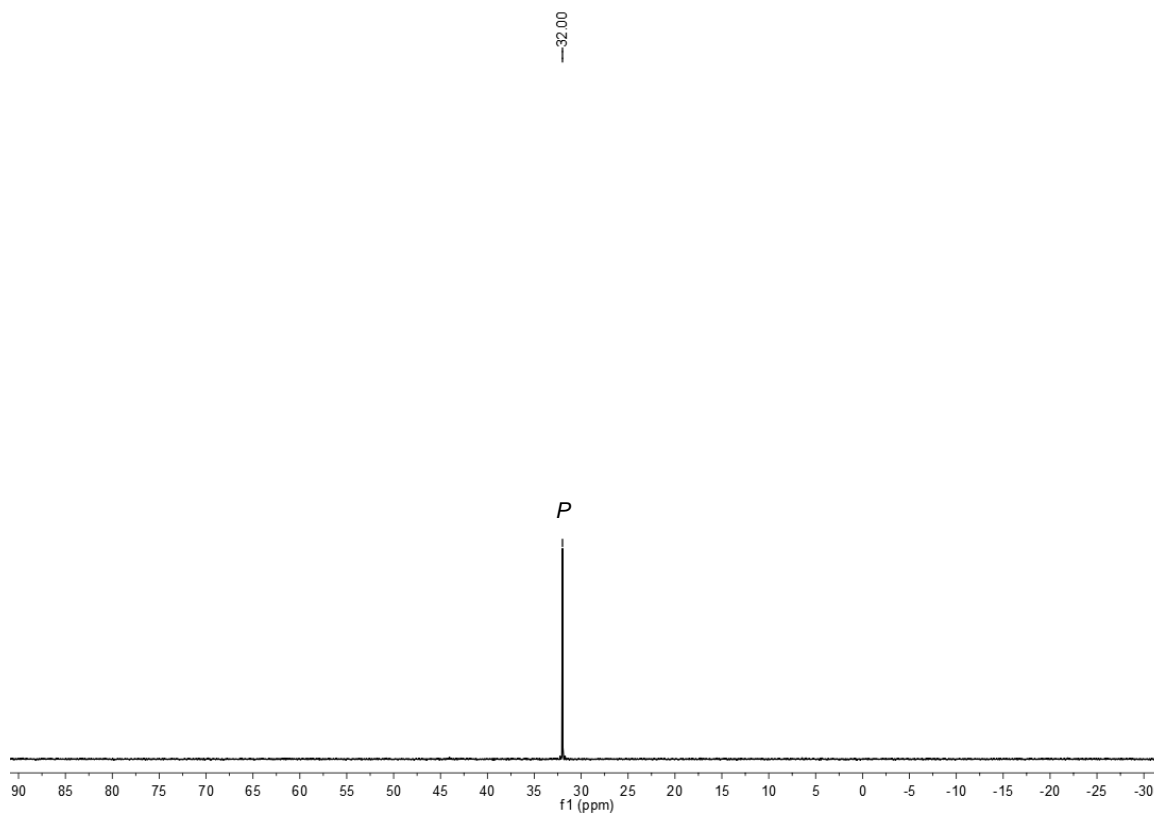

**Fig. S20**  $^{31}\text{P}$  NMR spectrum of LP-1 in  $\text{C}_6\text{D}_6$  at 298 K

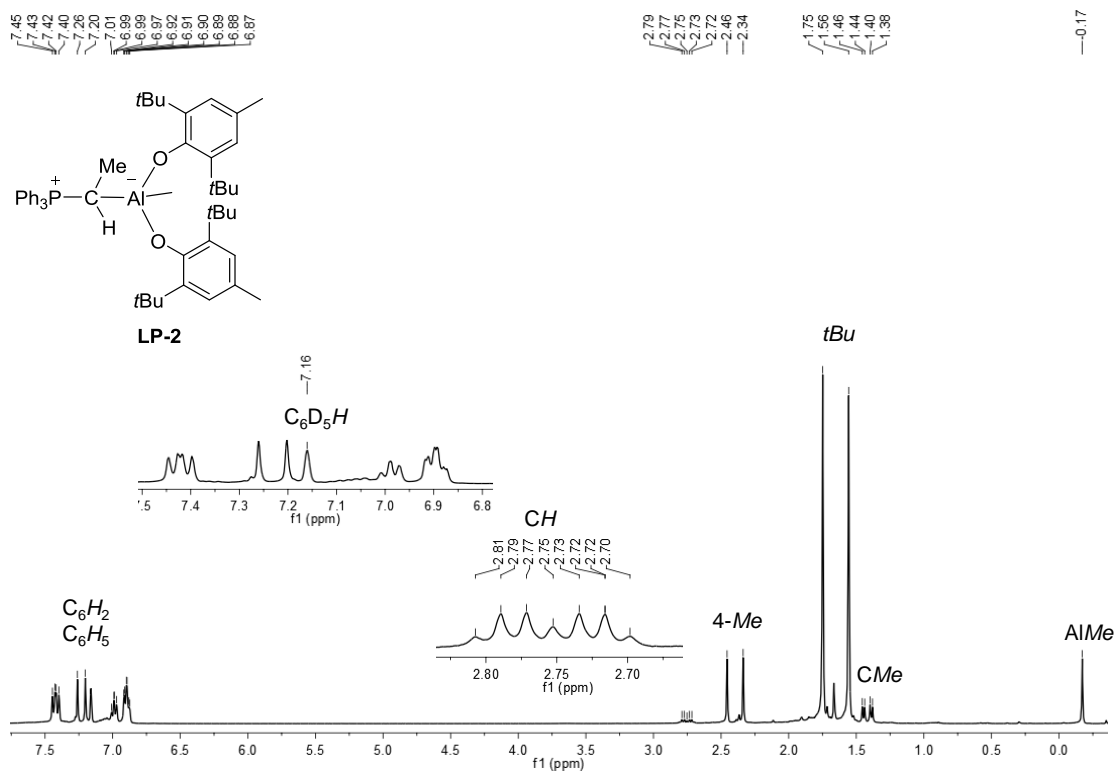

**Fig. S21**  $^1\text{H}$  NMR spectrum of LP-2 in  $\text{C}_6\text{D}_6$  at 298 K

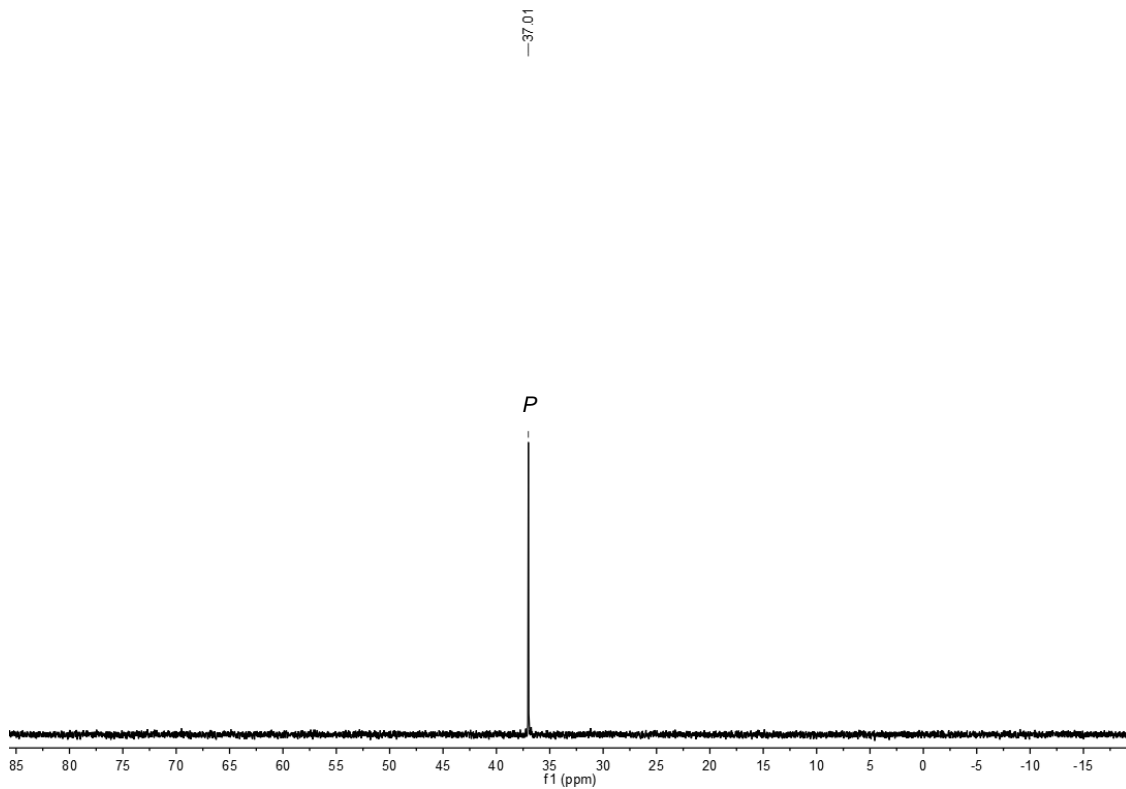

**Fig. S22**  $^{31}\text{P}$  NMR spectrum of LP-2 in  $\text{C}_6\text{D}_6$  at 298 K

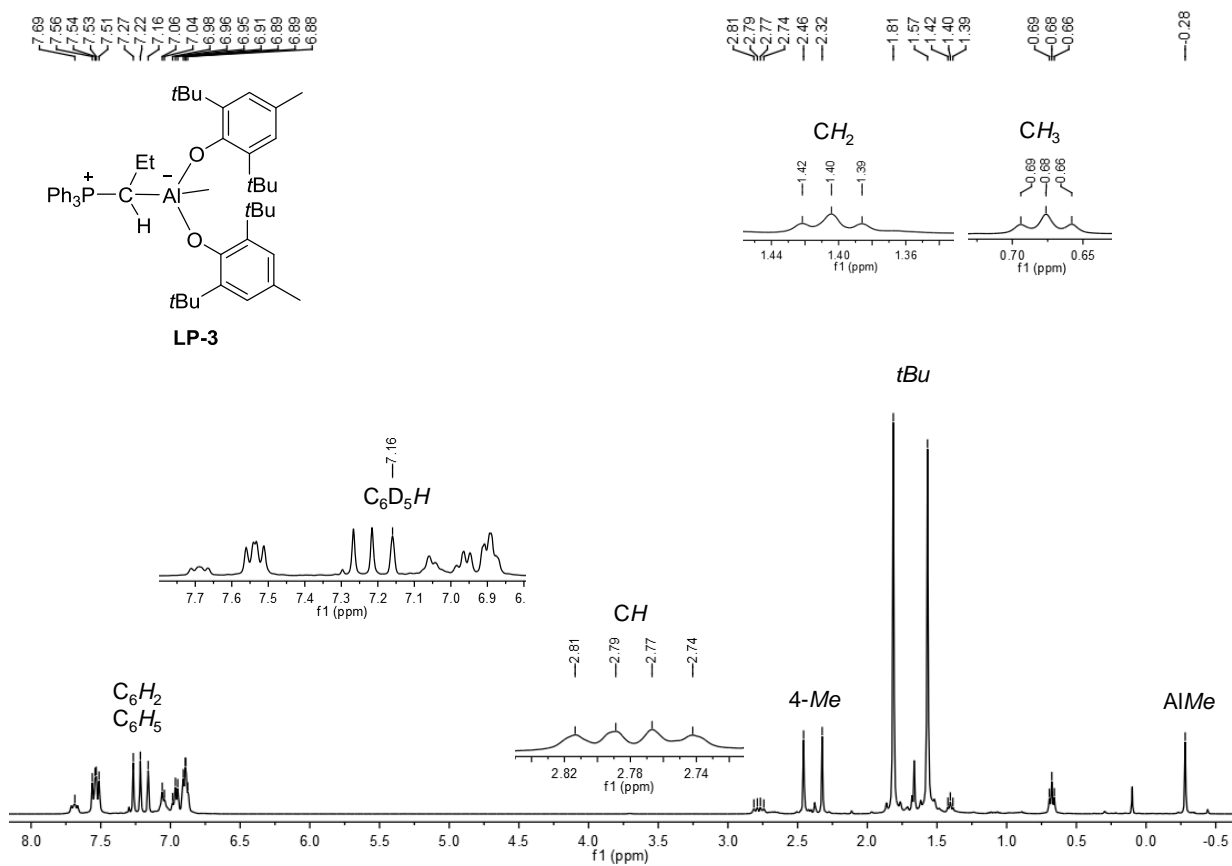

Fig. S23  $^1H$  NMR spectrum of LP-3 in  $C_6D_6$  at 298 K

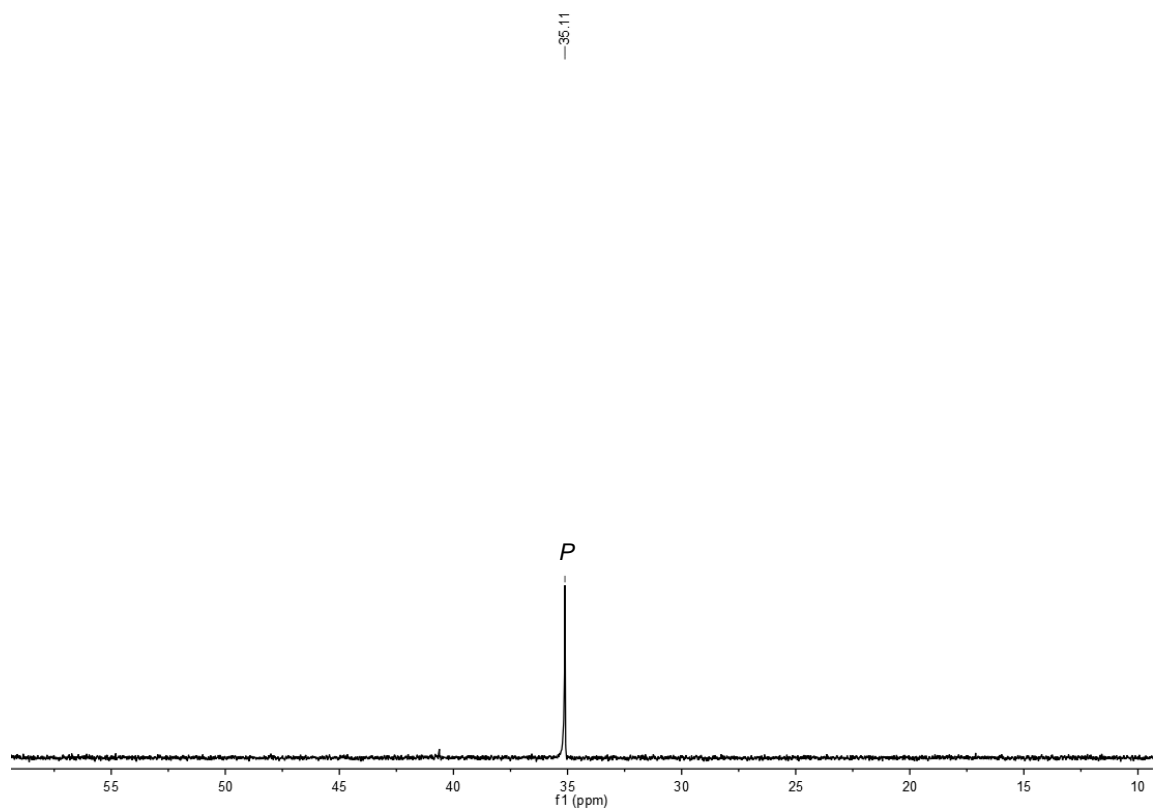

Fig. S24  $^{31}P$  NMR spectrum of LP-3 in  $C_6D_6$  at 298 K

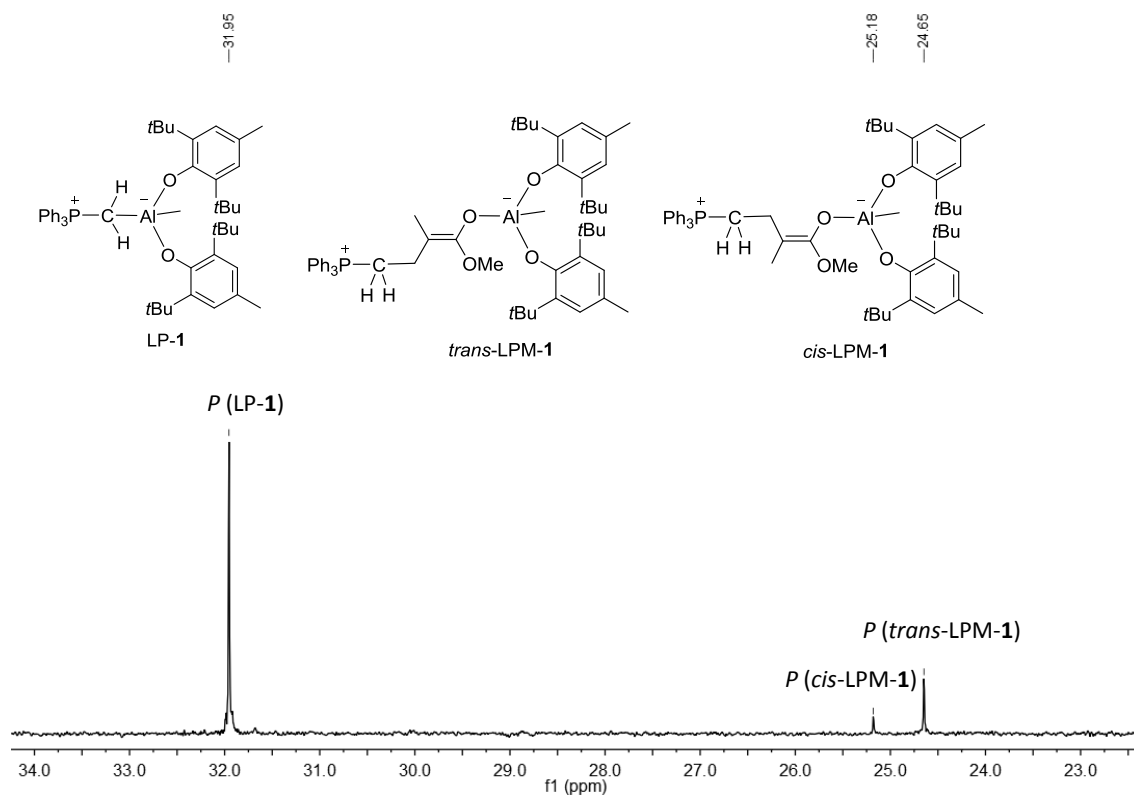

Fig. S25  $^{31}\text{P}$  NMR spectrum of LPM-1 in  $\text{C}_6\text{D}_6$  at 298 K

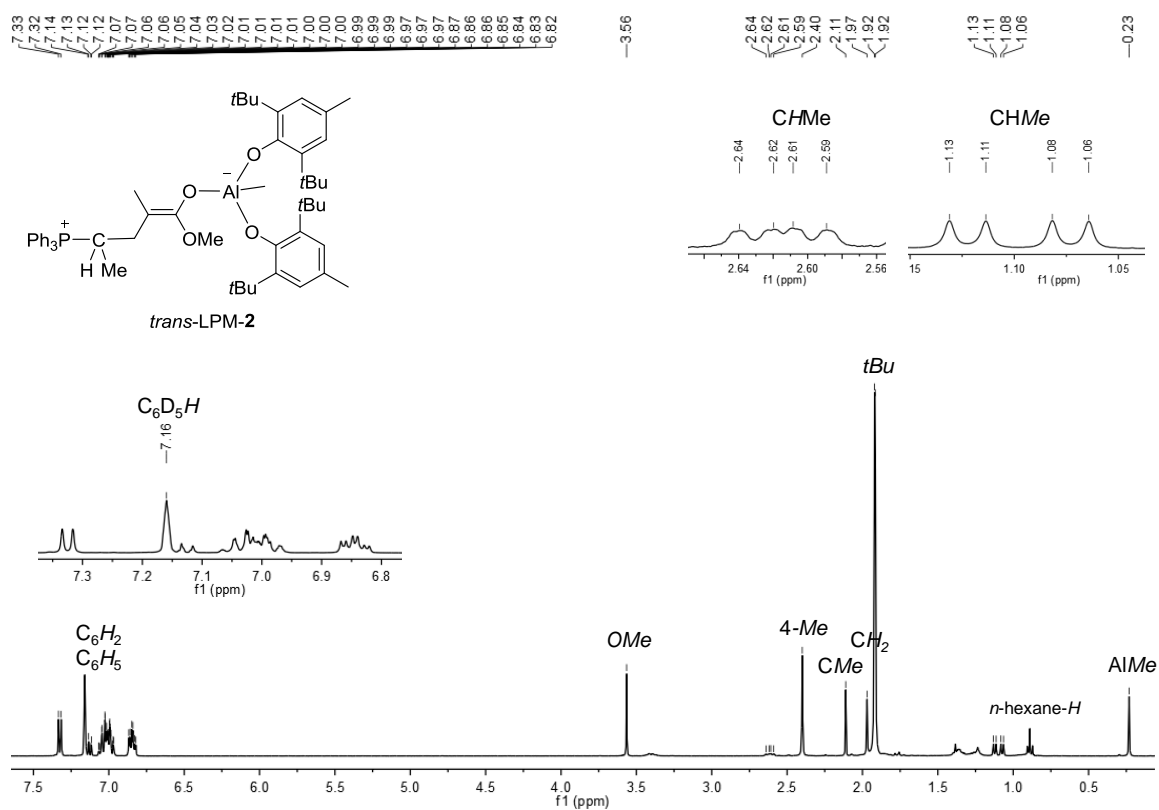

Fig. S26  $^1\text{H}$  NMR spectrum of LPM-2 in  $\text{C}_6\text{D}_6$  at 298 K

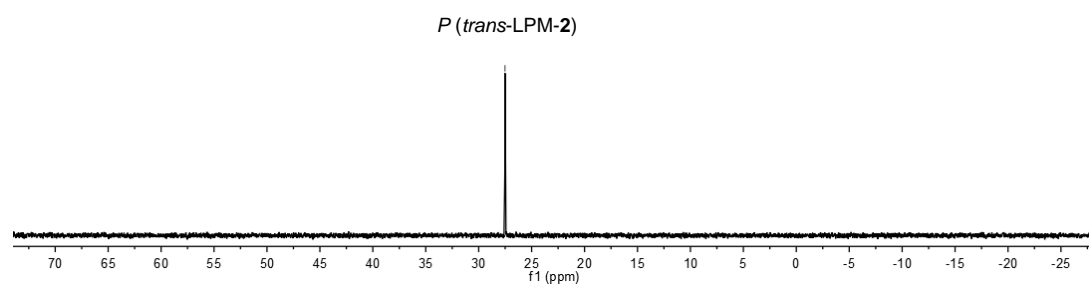

**Fig. S27**  $^{31}\text{P}$  NMR spectrum of LPM-2 in  $\text{C}_6\text{D}_6$  at 298 K

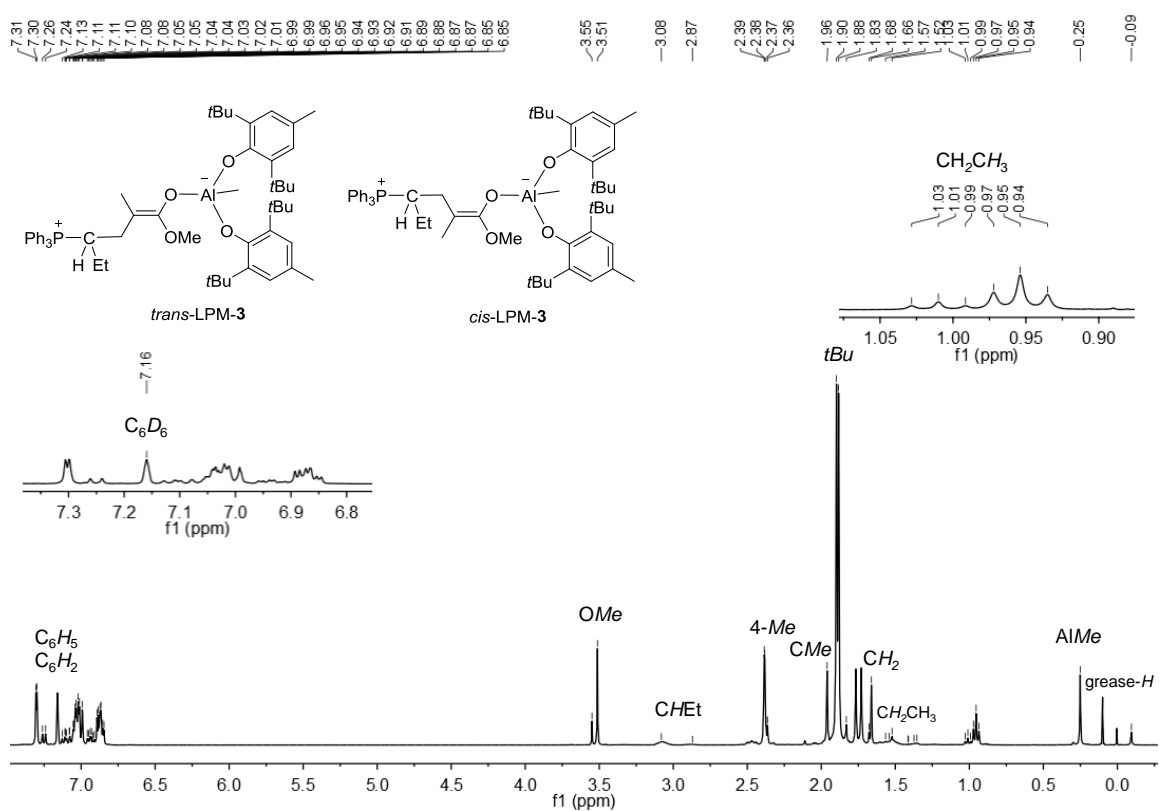

**Fig. S28**  $^1\text{H}$  NMR spectrum of LPM-3 in  $\text{C}_6\text{D}_6$  at 298K (Note: the data were labeled for *trans*-LPM-3)

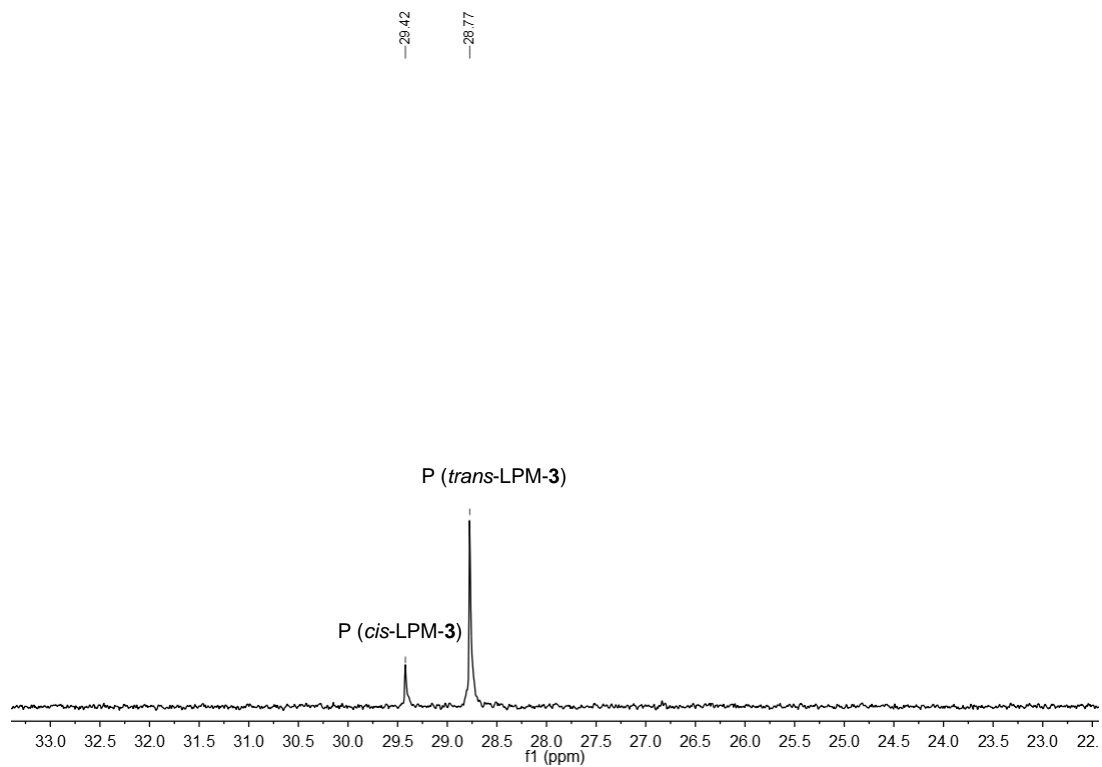

**Fig. S29**  $^{31}\text{P}$  NMR spectrum of LPM-3 in  $\text{C}_6\text{D}_6$  at 298 K

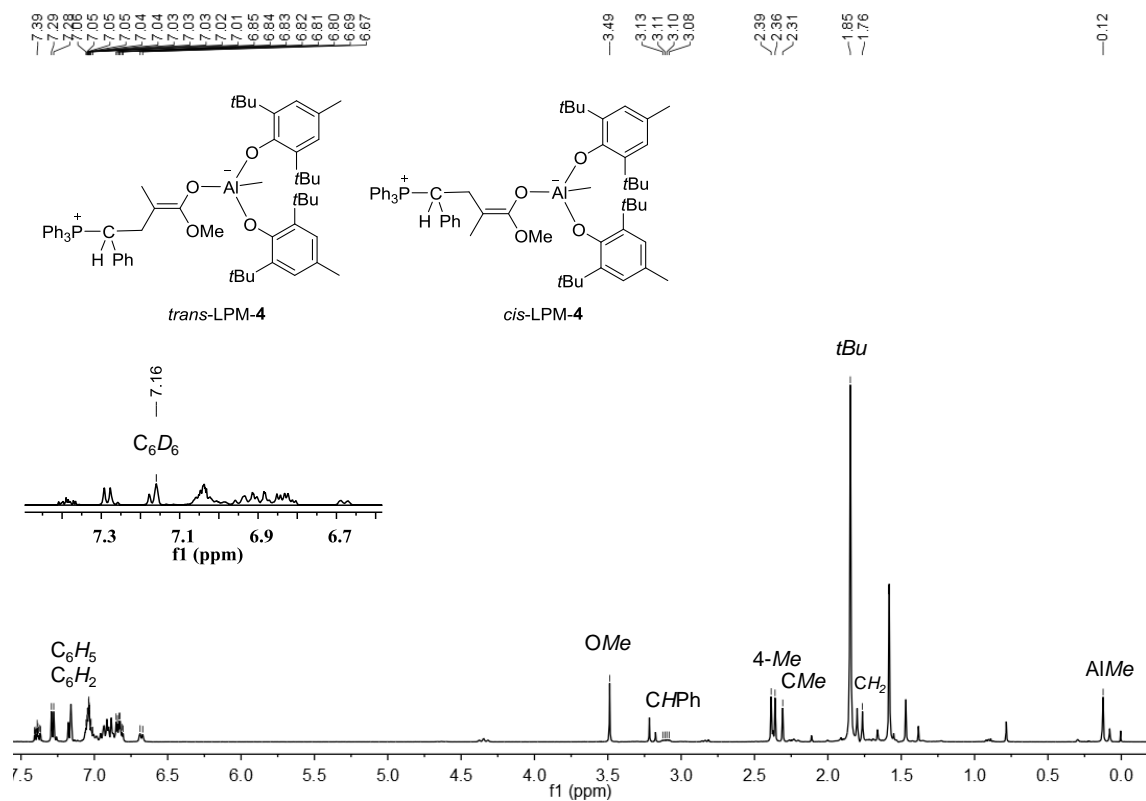

**Fig. S30**  $^1\text{H}$  NMR spectrum of LPM-4 in  $\text{C}_6\text{D}_6$  at 298 K (Note: the data were labeled for *trans*-LPM-4)



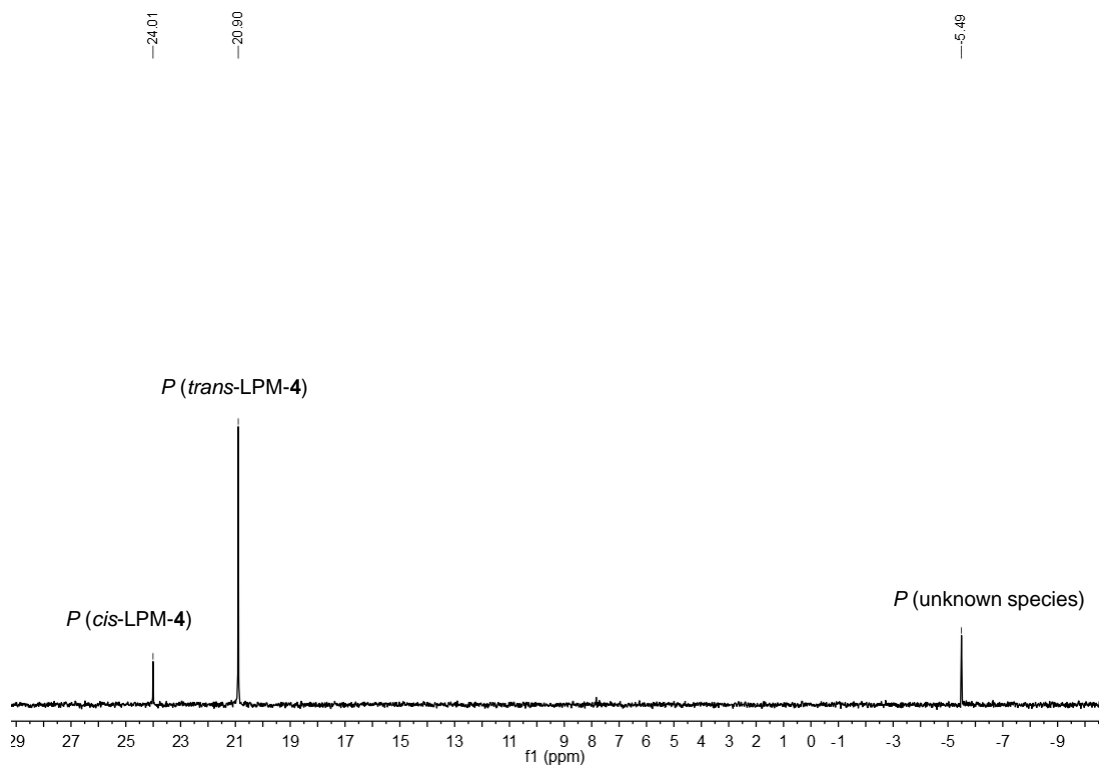

Fig. S31 <sup>31</sup>P NMR spectrum of LPM-4 in C<sub>6</sub>D<sub>6</sub> at 298 K

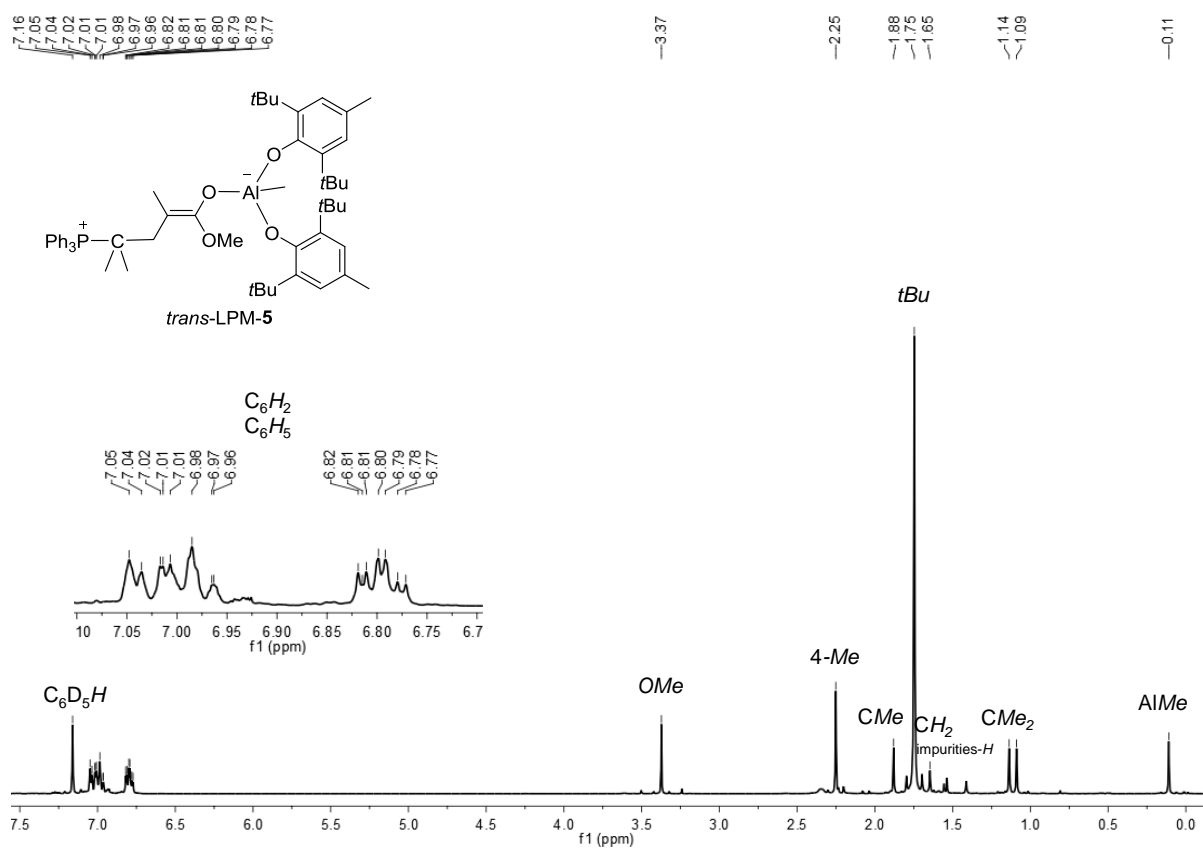

Fig. S32 <sup>1</sup>H NMR spectrum of LPM-5 in C<sub>6</sub>D<sub>6</sub> at 298 K

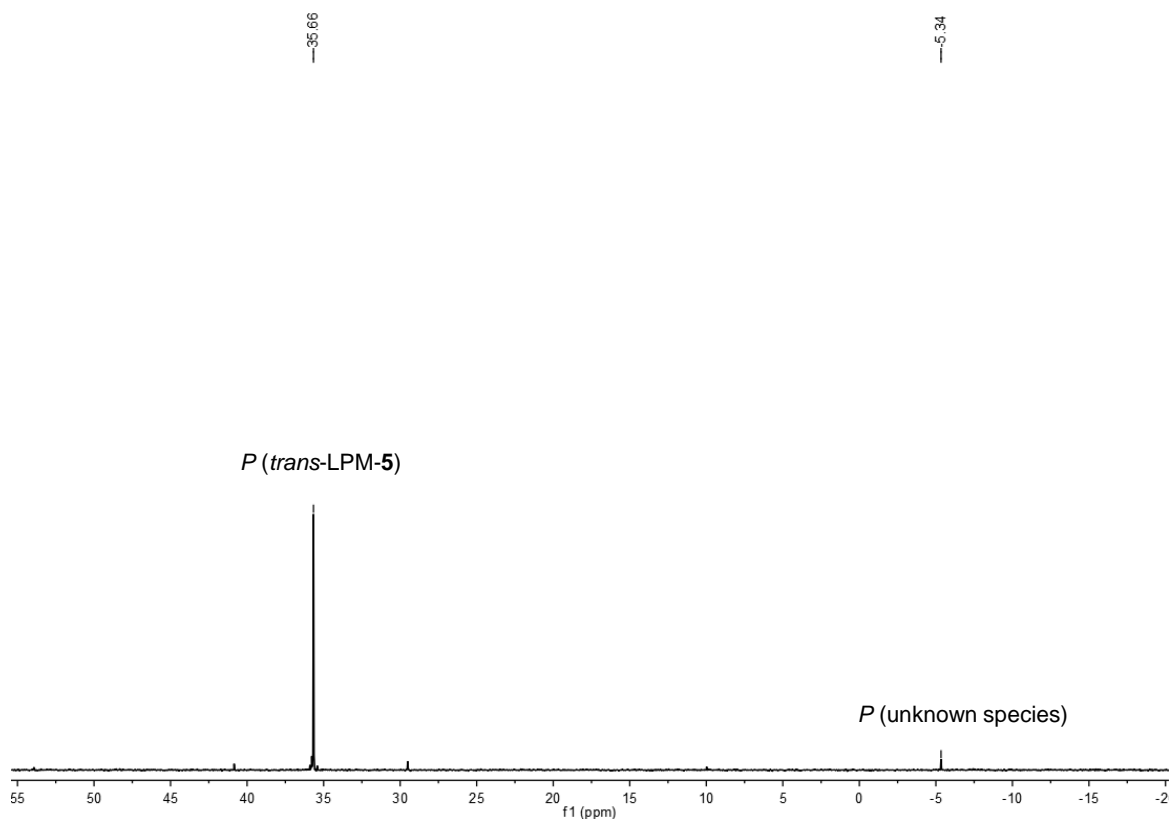

**Fig. S33**  $^{31}\text{P}$  NMR spectrum of LPM-5 in  $\text{C}_6\text{D}_6$  at 298 K

## VI. References

- 1 G. M. Sheldrick, *Acta. Cryst. Sect. C*, 2015, **71**, 3–8.
- 2 G. M. Sheldrick, *Acta. Cryst. Sect. A*, 2008, **64**, 112–122.
- 3 M. A. Beckett, D. S. Brassington, S. J. Coles and M. B. Hursthouse, *Inorg. Chem. Commun.*, 2000, **3**, 530–533.
- 4 Z. M. Heiden and A. P. Lathem, *Organometallics*, 2015, **34**, 1818–1827.
- 5 Y. Zhao and D. G. Truhlar, *Theor. Chem. Acc.*, 2008, **120**, 215–241.
- 6 R. Krishnan, J. S. Binkley, R. Seeger and J. A. Pople, *J. Chem. Phys.*, 1980, **72**, 650–654.
- 7 M. J. Frisch, J. A. Pople and J. S. Binkley, *J. Chem. Phys.*, 1984, **80**, 3265–3269.
- 8 A. E. Reed and F. Weinhold, *J. Chem. Phys.*, 1983, **78**, 4066–4073.
- 9 A. E. Reed, R. B. Weinstock, F. Weinhold, *J. Chem. Phys.*, 1985, **83**, 735–746.
- 10 A. E. Reed, Weinhold, F. *J. Chem. Phys.*, 1985, **83**, 1736–1740.
- 11 A. E. Reed, L. A. Curtiss and F. Weinhold, *Chem. Rev.*, 1988, **88**, 899–926.
- 12 J. E. Carpenter and F. Weinhold, *J. Mol. Struct. (Theochem)*, 1988, **46**, 41–62.
- 13 J. P. Foster and F. Weinhold, *J. Am. Chem. Soc.*, 1980, **102**, 7211–7218.
- 14 M. J. Frisch, G. W. Trucks, H. B. Schlegel, G. E. Scuseria, M. A. Robb, J. R. Cheeseman, G. Scalmani, V. Barone, B. Mennucci, G. A. Petersson, H. Nakatsuji, M. Caricato, X. Li, H. P. Hratchian, A. F. Izmaylov, J. Bloino, G. Zheng, J. L. Sonnenberg, M. Hada, M. Ehara, K. Toyota, R. Fukuda, J. Hasegawa, M. Ishida, T. Nakajima, Y. Honda, O. Kitao, H. Nakai, T. Vreven, J. J. A. Montgomery, J. E. Peralta, F. Ogliaro, M. Bearpark, J. J. Heyd, E. Brothers, K. N. Kudin, V. N.

Staroverov, R. Kobayashi, J. Normand, K. Raghavachari, A. Rendell, J. C. Burant, S. S. Iyengar, J. Tomasi, M. Cossi, N. Rega, J. M. Millam, M. Klene, J. E. Knox, J. B. Cross, V. Bakken, C. Adamo, J. Jaramillo, R. Gomperts, R. E. Stratmann, O. Yazyev, A. J. Austin, R. Cammi, C. Pomelli, J. W. Ochterski, R. L. Martin, K. Morokuma, V. G. Zakrzewski, G. A. Voth, P. Salvador, J. J. Dannenberg, S. Dapprich, A. D. Daniels, Ö. Farkas, J. B. Foresman, J. V. Ortiz, J. Cioslowski, D. J. Fox, *Gaussian 09*, Revision D.01; Gaussian, Inc.: Wallingford, CT, 2009.

END
